# Supplementary material for: A chemo-enzymatic oxidation/aldol sequential process directly converts arylbenzyl alcohols and cyclohexanol into chiral β-hydroxy carbonyls
Source: Royal Society of Chemistry journal article supplement (doi:10.1039/d1gc02831f), 2021-01-01

*Supporting Information*

**A chemo-enzymatic oxidation/Aldol sequential process directly converts  
arylbenzyl alcohols and cyclohexanol into chiral  $\beta$ -hydroxy carbonyls**

Yu Wang, Chengyi Wang, Qipeng Cheng, Su Yu, Hongyu Li, Rui Xiao, Chunxia Tan, Guohua Liu\*

*International Joint Laboratory on Resource Chemistry of Ministry of Education, Shanghai  
Engineering Research Center of Green Energy Chemical Engineering, Shanghai Normal University,  
Shanghai 200234, P. R. China. E-mail: ghliu@shnu.edu.cn*

**CONTENTS**

|                                                             |     |
|-------------------------------------------------------------|-----|
| <b>Experimental.</b> .....                                  | S2  |
| <b>Figure S1.</b> HPLC analyses of chiral products .....    | S6  |
| <b>Figure S2.</b> Characterization of chiral products ..... | S22 |

## Experimental

**1. General:** All manipulations were carried out under an inert atmosphere using a nitrogen-filled glovebox or Schlenk techniques. Deuterated solvents were purchased commercially and were degassed and stored over activated 4 Å molecular sieves. All other reagents were obtained from commercial sources and used without further purification. The *Trametes versicolor* was obtained from Sigma–Aldrich Company Ltd and used as received. Enzymatic activity was 0.78 unit mg<sup>-1</sup> protein (One unit is defined as the amount of enzyme that can reduce 1 µmol alcohol for a minute at pH 5.0 and 30 °C).

**2. Characterization:** The <sup>1</sup>H NMR spectra were performed on a Bruker Avance DPX-400 spectrometer in CDCl<sub>3</sub> solutions. Chemical shifts are given in parts per million (δ units) downfield from tetramethylsilane using the residual solvent signal (CHCl<sub>3</sub>, δ 7.26) as internal standard. <sup>1</sup>H NMR information is given in the following format: multiplicity (s, singlet; d, doublet; t, triplet; q, quartet; qui, quintet; sept, septet; m, multiplet), coupling constant(s) (J) in Hertz (Hz), the number of protons. The prefix app is occasionally applied when the true signal multiplicity was unresolved and br indicates the signal in question broadened. High-resolution mass spectrometry (HRMS) spectra were obtained on a micro TOF-QII Instrument.

### 3. Data of chiral products.

**(*S,R*)-5a: (*S*)-2-((*R*)-hydroxy(phenyl)methyl)cyclohexan-1-one.** (Laccase/**E** + catalyst **D**): 35% yield, 95% *ee*, 91/9 *dr*; (Laccase/**E** + catalyst **C**): 75% yield, 97% *ee*, 95/5 *dr*. <sup>1</sup>H NMR (400 MHz, Chloroform-*d*): δ 7.44 – 7.21 (m, 4H), 4.79 (d, J = 8.8 Hz, 1H), 2.70 – 2.28 (m, 2H), 2.09 (ddt, J = 12.5, 5.9, 3.1 Hz, 1H), 1.89 – 1.45 (m, 4H), 1.42 – 1.24 (m, 1H). HRMS (ESI): *m/z* [M+H]<sup>+</sup> calcd for [C<sub>13</sub>H<sub>16</sub>NO<sub>2</sub>]<sup>+</sup> 205.1223; found: 205.1223. (HPLC: Chiracel OD-H, detected at 213 nm, eluent: n-hexane/2-propanol = 99/1, flow rate = 1.0 mL/min, 25 °C).

**(*S,R*)-5b: (*S*)-2-((*R*)-(2-fluorophenyl)(hydroxy)methyl)cyclohexan-1-one.** (Laccase/**E** + catalyst **D**): 88% yield, 99% *ee*, 98/2 *dr*; (Laccase/**E** + catalyst **C**): 76% yield, 98% *ee*, 98/2 *dr*. <sup>1</sup>H NMR (400 MHz, Chloroform-*d*): δ 7.40 (td, J = 7.4, 1.9 Hz, 1H), 7.23 – 7.15 (m, 1H), 7.14 – 6.88 (m, 2H), 5.11 (d, J = 8.7 Hz, 1H), 2.69 – 2.55 (m, 1H), 2.48 – 2.21 (m, 2H), 2.02 (ddt, J = 12.2, 5.8, 2.9 Hz, 1H), 1.82 – 1.71 (m, 1H), 1.67 – 1.30 (m, 4H). HRMS (ESI): *m/z* [M+H]<sup>+</sup> calcd for [C<sub>13</sub>H<sub>15</sub>FO<sub>2</sub>]<sup>+</sup> 223.1129; found: 223.1130. (HPLC: Chiracel AS-H, detected at 254 nm, eluent: n-hexane/2-propanol = 95/5, flow rate = 1.0 mL/min, 25 °C).

**(*S,R*)-5c: (*S*)-2-((*R*)-(2-chlorophenyl)(hydroxy)methyl)cyclohexan-1-one.** (Laccase/**E** + catalyst **D**): 68% yield, 96% *ee*, 98/2 *dr*; (Laccase/**E** + catalyst **C**): 76% yield, 93% *ee*, 90/10 *dr*. <sup>1</sup>H NMR (400 MHz, Chloroform-*d*): δ 7.55 – 7.08 (m, 4H), 5.67 – 5.23 (m, 1H), 2.79 – 2.55 (m, 1H), 2.45 – 2.22 (m, 2H), 2.07 – 1.97 (m, 1H), 1.82 – 1.41 (m, 5H). HRMS (ESI): *m/z* [M+H]<sup>+</sup> calcd for [C<sub>13</sub>H<sub>16</sub>ClO<sub>2</sub>]<sup>+</sup> 283.0328 ; found: 283.0834. (HPLC: Chiracel OD-H, detected at 220 nm, eluent: n-hexane/2-propanol = 99/1, flow rate = 1.0 mL/min, 25 °C).

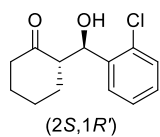

**(*S,R*)-5d: (*S*)-2-((*R*)-(4-chlorophenyl)(hydroxy)methyl)cyclohexan-1-one.** (Laccase/**E** + catalyst **D**): 62% yield, 96% *ee*, 89/11 *dr*; (Laccase/**E** + catalyst **C**): 64% yield, 97% *ee*, 84/16 *dr*. <sup>1</sup>H NMR (400 MHz, Chloroform-*d*): δ 7.31 – 7.12 (m, 4H), 5.34 – 4.63 (m, 1H), 2.56 – 2.21 (m, 3H), 2.02 (ddt, *J* = 12.2, 5.8, 3.0 Hz, 1H), 1.82 – 1.39 (m, 4H), 1.22 (qd, *J* = 13.6, 12.9, 5.0 Hz, 1H). HRMS (ESI): *m/z* [M+H]<sup>+</sup> calcd for [C<sub>13</sub>H<sub>16</sub>ClO<sub>2</sub>]<sup>+</sup> 283.0833; found: 283.0834. (HPLC: Chiracel AD-H, detected at 220 nm, eluent: n-hexane/2-propanol = 90/10, flow rate = 0.5 mL/min, 25 °C).

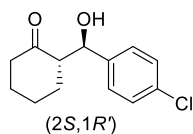

**(*S,R*)-5e: (*S*)-2-((*R*)-(2-bromophenyl)(hydroxy)methyl)cyclohexan-1-one.** (Laccase/**E** + catalyst **D**): 80% yield, 94% *ee*, 93/7 *dr*; (Laccase/**E** + catalyst **C**): 84 %yield, 93% *ee*, 90/10 *dr*. <sup>1</sup>H NMR (400 MHz, Chloroform-*d*): δ 7.57 – 7.22 (m, 3H), 7.14 – 7.00 (m, 1H), 5.23 (d, *J* = 8.0 Hz, 1H), 2.83 – 2.43 (m, 1H), 2.43 – 2.18 (m, 2H), 2.10 – 1.93 (m, 1H), 1.83 – 1.34 (m, 5H). HRMS (ESI): *m/z* [M+H]<sup>+</sup> calcd for [C<sub>13</sub>H<sub>16</sub>BrO<sub>2</sub>]<sup>+</sup> 283.0328; found: 283.0327. (HPLC: Chiracel OD-H, detected at 220 nm, eluent: n-hexane/2-propanol = 90/10, flow rate = 0.5 mL/min, 25 °C).

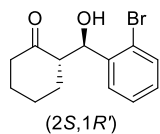

**(*S,R*)-5f: (*S*)-2-((*R*)-(4-bromophenyl)(hydroxy)methyl)cyclohexan-1-one.** (Laccase/**E** + catalyst **D**): 71% yield, 95% *ee*, 88/12 *dr*; (Laccase/**E** + catalyst **C**): 78 %yield, 92% *ee*, 89/11 *dr*. <sup>1</sup>H NMR (400 MHz, Chloroform-*d*): δ 7.44 – 7.34 (m, 2H), 7.12 (dd, *J* = 8.6, 6.8 Hz, 2H), 5.32 – 4.61 (m, 1H), 2.55 – 2.21 (m, 3H), 2.02 (ddt, *J* = 12.2, 5.7, 2.9 Hz, 1H), 1.86 – 1.38 (m, 4H), 1.22 (qd, *J* = 13.6, 13.0, 5.0 Hz, 1H). HRMS (ESI): *m/z* [M+H]<sup>+</sup> calcd for [C<sub>13</sub>H<sub>16</sub>BrO<sub>2</sub>]<sup>+</sup> 283.0328 ; found: 283.0319 (HPLC: Chiracel AD-H, detected at 220 nm, eluent: n-hexane/2-propanol = 90/10, flow rate = 1.0 mL/min, 25 °C).

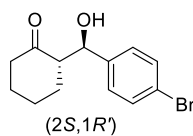

**(*S,R*)-5g: (*S*)-2-((*R*)-hydroxy(4-(trifluoromethyl)phenyl)methyl)cyclohexan-1-one.** (Laccase/**E** + catalyst **D**): 29% yield, 98% *ee*, 91/9 *dr*; (Laccase/**E** + catalyst **C**): 75% yield, 98% *ee*, 91/9 *dr*. <sup>1</sup>H NMR (400 MHz, Chloroform-*d*): δ 7.59 – 7.15 (m, 4H), 5.42 – 4.70 (m, 1H), 2.57 – 2.21 (m, 3H), 2.03 (ddt, *J* = 12.2, 5.8, 3.0 Hz, 1H), 1.82 – 1.42 (m, 4H), 1.36 – 1.16 (m, 1H). HRMS (ESI): *m/z* [M+H]<sup>+</sup> calcd for [C<sub>14</sub>H<sub>16</sub>F<sub>3</sub>O<sub>2</sub>]<sup>+</sup> 273.1097; found: 273.1098 (HPLC: Chiracel AD-H, detected at 220 nm, eluent: n-hexane/2-propanol = 90/10, flow rate = 0.5 mL/min, 25 °C).

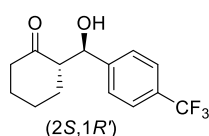

**(S,R)-5h: (S)-2-((R)-hydroxy(2-nitrophenyl)methyl)cyclohexan-1-one.** (Laccase/**E** + catalyst **D**):

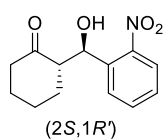

90% yield, 99% *ee*, 98/2 *dr*; (Laccase/**E** + catalyst **C**): 85% yield, 99% *ee*, 98/2 *dr*. <sup>1</sup>H NMR (400 MHz, Chloroform-*d*):  $\delta$  7.95 – 7.30 (m, 4H), 5.37 (d, *J* = 7.0 Hz, 1H), 4.08 (d, *J* = 21.9 Hz, 1H), 2.86 – 2.60 (m, 1H), 2.44 – 2.22 (m, 2H), 2.02 (ddt, *J* = 12.6, 5.8, 3.0 Hz, 1H), 1.82 – 1.40 (m, 5H). HRMS (ESI): *m/z* [M+H]<sup>+</sup> calcd for [C<sub>13</sub>H<sub>15</sub>NO<sub>4</sub>]<sup>+</sup>

250.1074; found: 250.1073. (HPLC: Chiracel AS-H, detected at 254 nm, eluent: n-hexane/2-propanol = 95/5, flow rate = 0.5 mL/min, 25 °C).

**(S,R)-5i: (S)-2-((R)-hydroxy(3-nitrophenyl)methyl)cyclohexan-1-one.** (Laccase/**E** + catalyst **D**): 87%

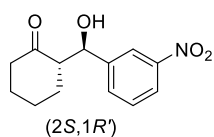

yield, 98% *ee*, 89/11 *dr*; (Laccase/**E** + catalyst **C**): 80% yield, 99% *ee*, 95/5 *dr*. <sup>1</sup>H NMR (400 MHz, Chloroform-*d*):  $\delta$  8.19 – 8.01 (m, 2H), 7.59 (dq, *J* = 7.8, 1.9 Hz, 1H), 7.44 (td, *J* = 7.9, 3.6 Hz, 1H), 4.81 (dd, *J* = 8.5, 2.2 Hz, 1H), 4.23 – 3.83 (m, 1H), 2.63 – 2.24 (m, 3H), 2.11 – 1.94 (m, 1H), 1.86 – 1.14 (m, 5H). HRMS (ESI):

*m/z* [M+H]<sup>+</sup> calcd for [C<sub>13</sub>H<sub>15</sub>NO<sub>4</sub>]<sup>+</sup> 250.1074; found: 250.1073. (HPLC: Chiracel AD-H, detected at 254 nm, eluent: n-hexane/2-propanol = 95/5, flow rate = 0.8 mL/min, 25 °C).

**(S,R)-5j: (S)-2-((R)-hydroxy(4-nitrophenyl)methyl)cyclohexan-1-one.** (Laccase/**E** + catalyst **D**): 91%

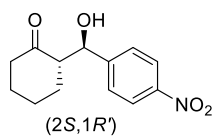

yield, 99% *ee*, 93/7 *dr*; (Laccase/**E** + catalyst **C**): 82% yield, 99% *ee*, 92/8 *dr*. <sup>1</sup>H NMR (400 MHz, Chloroform-*d*):  $\delta$  7.31 – 7.12 (m, 4H), 5.34 – 4.63 (m, 1H), 2.56 – 2.21 (m, 3H), 2.02 (ddt, *J* = 12.2, 5.8, 3.0 Hz, 1H), 1.82 – 1.39 (m, 4H), 1.22 (qd, *J*

= 13.5, 12.9, 5.0 Hz, 1H). HRMS (ESI): *m/z* [M+H]<sup>+</sup> calcd for [C<sub>13</sub>H<sub>15</sub>NO<sub>4</sub>]<sup>+</sup> 250.1074; found: 250.1073. (HPLC: Chiracel AD-H, detected at 254 nm, eluent: n-hexane/2-propanol = 90/10, flow rate = 1.0 mL/min, 25 °C).

**(S,R)-5k: 4-((S)-hydroxy((R)-2-oxocyclohexyl)methyl)benzonitrile.** (Laccase/**E** + catalyst **D**): 91%

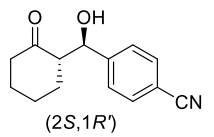

yield, 87% *ee*, 82/18 *dr*; (Laccase/**E** + catalyst **C**): 89% yield, 96% *ee*, 90/10 *dr*. <sup>1</sup>H NMR (400 MHz, Chloroform-*d*):  $\delta$  7.61 – 7.30 (m, 4H), 5.39 – 4.71 (m, 1H), 3.55 (dd, *J* = 345.7, 3.2 Hz, 1H), 2.56 – 2.22 (m, 3H), 2.02 (ddt, *J* = 12.1, 5.9, 2.9 Hz, 1H),

1.81 – 1.40 (m, 4H), 1.33 – 1.15 (m, 1H). HRMS (ESI): *m/z* [M+H]<sup>+</sup> calcd for [C<sub>14</sub>H<sub>15</sub>NO<sub>2</sub>]<sup>+</sup> 230.1176; found: 230.1175. (HPLC: Chiracel AD-H, detected at 220 nm, eluent: n-hexane/2-propanol = 90/10, flow rate = 0.5 mL/min, 25 °C).

**(S,R)-5l: (S)-2-((R)-hydroxy(m-tolyl)methyl)cyclohexan-1-one.** (Laccase/**E** + catalyst **D**): 29% yield, 95% *ee*, 95/5 *dr*; (Laccase/**E** + catalyst **C**): 46% yield, 91% *ee*, 89/11 *dr*. <sup>1</sup>H NMR (400 MHz,

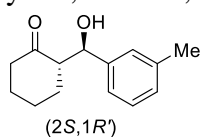

Chloroform-*d*):  $\delta$  7.44 – 6.97 (m, 4H), 5.34 – 4.60 (m, 1H), 2.59 – 2.35 (m, 2H), 2.29 (d, *J* = 7.0 Hz, 3H), 2.01 (ddt, *J* = 12.3, 5.8, 3.0 Hz, 1H), 1.90 – 1.41 (m, 4H), 1.28 – 1.15 (m, 1H). HRMS (ESI): *m/z* [M+H]<sup>+</sup> calcd for [C<sub>14</sub>H<sub>18</sub>O<sub>2</sub>]<sup>+</sup> 218.138; found:

218.1378. (HPLC: Chiracel OD-H, detected at 254 nm, eluent: n-hexane/2-propanol = 97/3, flow rate = 0.5 mL/min, 25 °C).

**(*S,R*)-5m: (*S*)-2-((*R*)-hydroxy(*p*-tolyl)methyl)cyclohexan-1-one.** (Laccase/**E** + catalyst **D**): 14% yield, 97% *ee*, 94/6 *dr*; (Laccase/**E** + catalyst **C**): 46% yield, 96% *ee*, 92/8 *dr*. <sup>1</sup>H

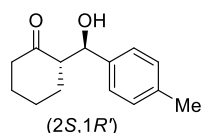

NMR (400 MHz, Chloroform-*d*):  $\delta$  7.26 – 7.00 (m, 4H), 5.32 – 4.61 (m, 1H), 2.53 (dddd, *J* = 12.8, 8.8, 5.5, 1.2 Hz, 1H), 2.40 (dddd, *J* = 13.6, 4.6, 3.0, 1.7 Hz, 1H), 2.33 – 2.23 (m, 4H), 2.00 (ddq, *J* = 11.8, 5.7, 2.9 Hz, 1H), 1.75 – 1.40 (m, 4H), 1.27

– 1.14 (m, 1H). HRMS (ESI): *m/z* [*M*+*H*]<sup>+</sup> calcd for [C<sub>14</sub>H<sub>18</sub>O<sub>2</sub>]<sup>+</sup> 218.138; found: 218.1376. (HPLC: Chiracel OD-H, detected at 254 nm, eluent: n-hexane/2-propanol = 97/3, flow rate = 0.5 mL/min, 25 °C).

**(*S,R*)-5n: (*S*)-2-((*R*)-furan-2-yl(hydroxy)methyl)cyclohexan-1-one.** (Laccase/**E** + catalyst **D**): 64% yield, 87% *ee*, 94/6 *dr*; (Laccase/**E** + catalyst **C**): 77% yield, 90% *ee*, 80/20 *dr*. <sup>1</sup>H NMR

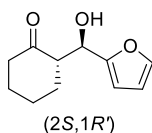

(400 MHz, Chloroform-*d*):  $\delta$  7.47 (dd, *J* = 65.3, 1.7 Hz, 1H), 6.65 – 6.25 (m, 2H), 4.83 (d, *J* = 8.5 Hz, 1H), 2.92 (h, *J* = 6.9, 6.0 Hz, 1H), 2.55 – 2.32 (m, 2H), 2.17 – 1.52 (m, 5H), 1.41 – 1.23 (m, 1H). HRMS (ESI): *m/z* [*M*+*H*]<sup>+</sup> calcd for [C<sub>11</sub>H<sub>14</sub>O<sub>3</sub>]<sup>+</sup> 211.0787;

found: 211.0782. (HPLC: Chiracel AD-H, detected at 220 nm, eluent: n-hexane/2-propanol = 90/10, flow rate = 0.5 mL/min, 25 °C).

**(*S,R*)-5o: (*S*)-2-((*R*)-hydroxy(thiophen-2-yl)methyl)cyclohexan-1-one.** (Laccase/**E** + catalyst **D**): 44%

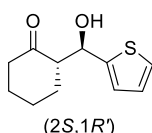

yield, 91% *ee*, 85/15 *dr*; (Laccase/**E** + catalyst **C**): 64 % yield, 68% *ee*, 72/28 *dr*. <sup>1</sup>H NMR (400 MHz, Chloroform-*d*):  $\delta$  7.34 – 6.83 (m, 3H), 5.53 – 4.96 (m, 1H), 2.66 – 2.54 (m, 1H), 2.46 – 2.23 (m, 2H), 1.80 – 1.47 (m, 4H), 1.33 – 1.14 (m, 1H). HRMS (ESI): *m/z*

[*M*+*H*]<sup>+</sup> calcd for [C<sub>11</sub>H<sub>14</sub>SO<sub>2</sub>]<sup>+</sup> 211.0787; found: 211.0782. (HPLC: Chiracel AD-H, detected at 254 nm, eluent: n-hexane/2-propanol = 90/10, flow rate = 1.0 mL/min, 25 °C).

**(*S,R*)-5p: (*S*)-2-((*R*)-hydroxy(naphthalen-1-yl)methyl)cyclohexan-1-one.** (Laccase/**E** + catalyst **D**):

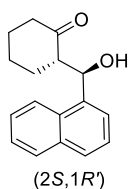

59% yield, 98% *ee*, 94/6 *dr*; (Laccase/**E** + catalyst **C**): 86% yield, 84% *ee*, 83/17 *dr*. <sup>1</sup>H NMR (400 MHz, Chloroform-*d*):  $\delta$  8.25 – 7.17 (m, 7H), 6.21 – 5.47 (m, 1H), 2.92 (dddd, *J* = 12.2, 8.7, 6.0, 1.2 Hz, 1H), 2.51 – 2.27 (m, 2H), 2.01 (dtd, *J* = 12.1, 6.0, 2.9 Hz, 1H), 1.70 – 1.16 (m, 6H). HRMS (ESI): *m/z* [*M*+*H*]<sup>+</sup> calcd for [C<sub>17</sub>H<sub>18</sub>O<sub>2</sub>]<sup>+</sup> 255.138; found:

255.1372. (HPLC: Chiracel AD-H, detected at 254 nm, eluent: n-hexane/2-propanol = 95/5, flow rate = 1.0 mL/min, 25 °C).

**Figure S1.** HPLC analyses for chiral products.

**(*S,R*)-5a:** (*S*)-2-((*R*)-hydroxy(phenyl)methyl)cyclohexan-1-one.

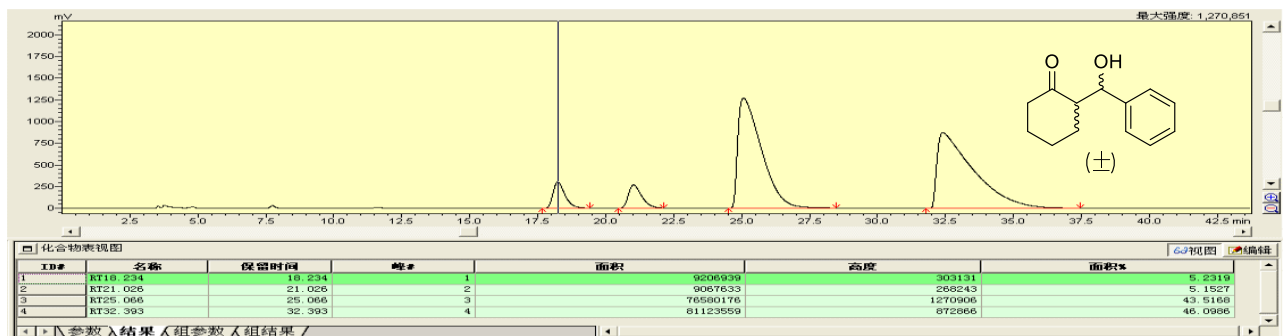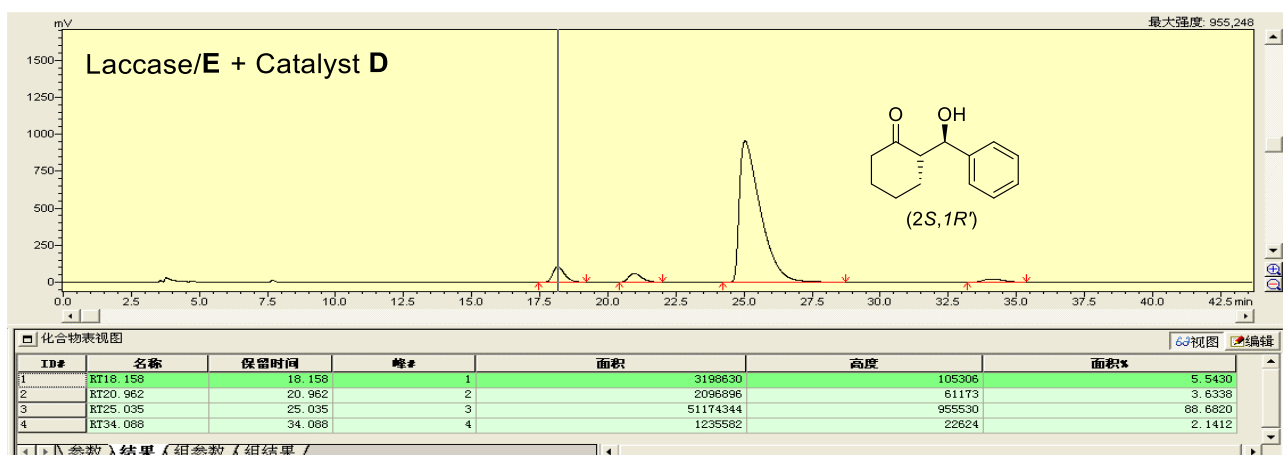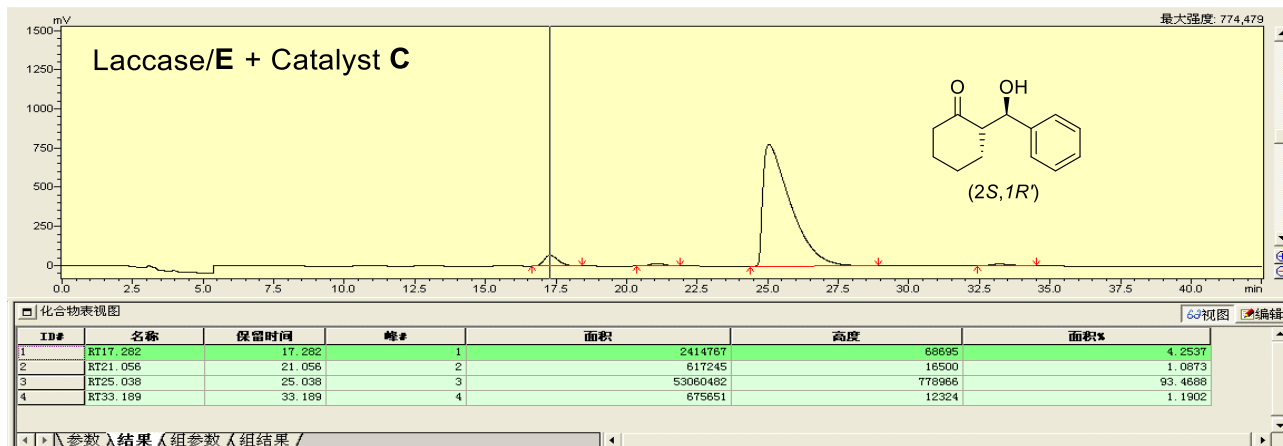

**Translation of all characters (Chinese) in the above two frameworks to English is as follows:**

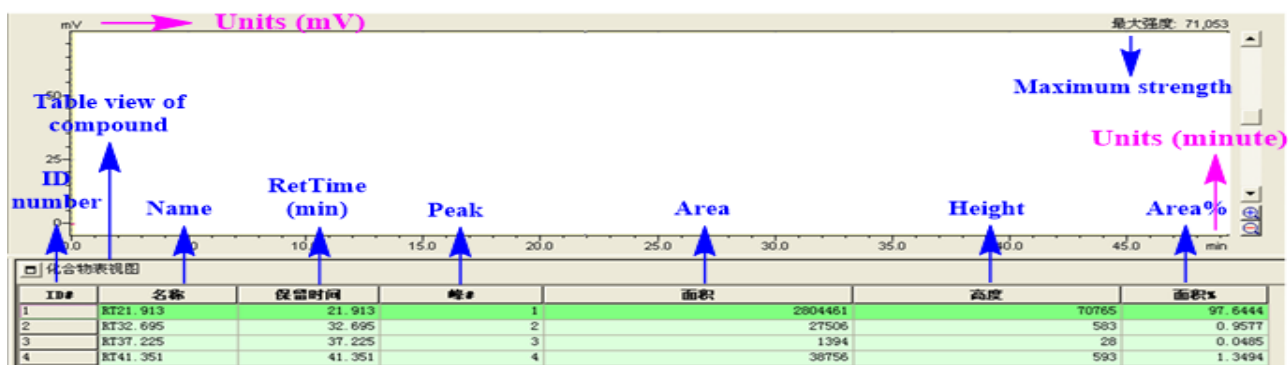

**(S,R)-5b:** (S)-2-((R)-(2-fluorophenyl)(hydroxy)methyl)cyclohexan-1-one.

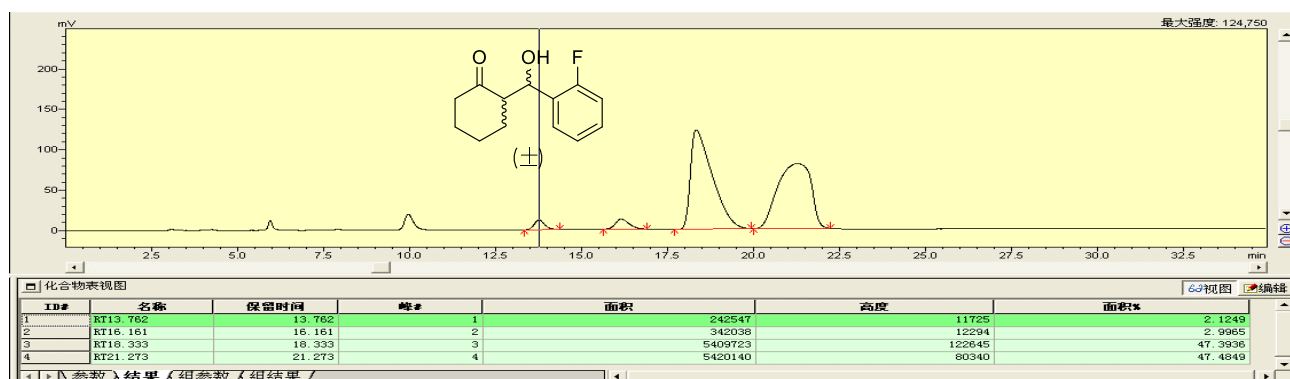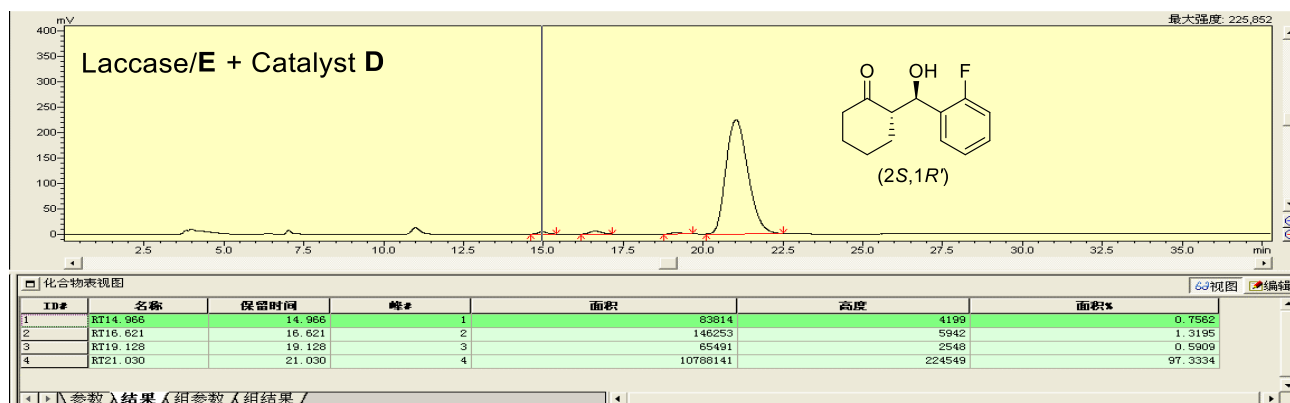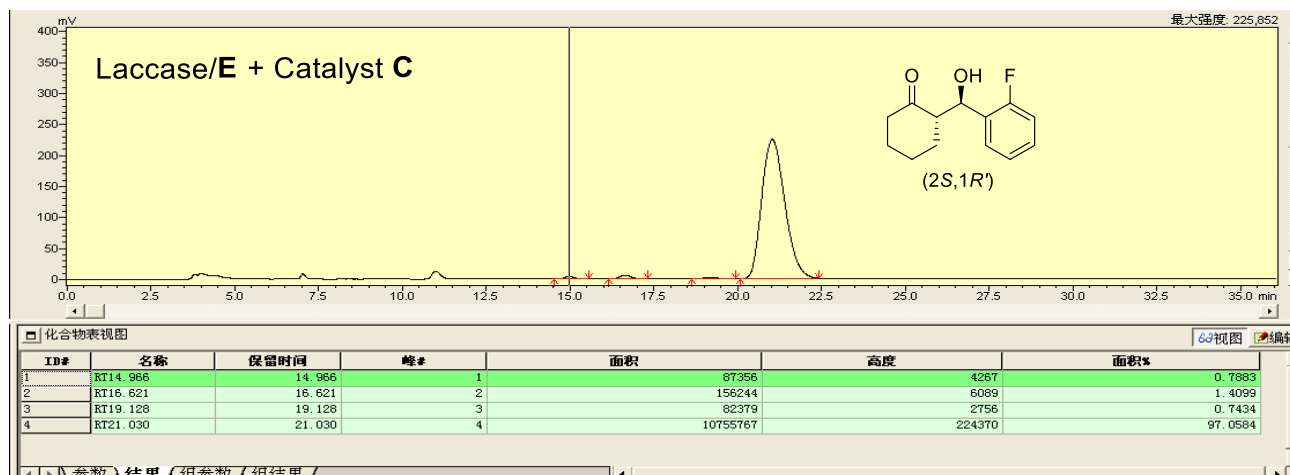

**Translation of all characters (Chinese) in the above two frameworks to English is as follows:**

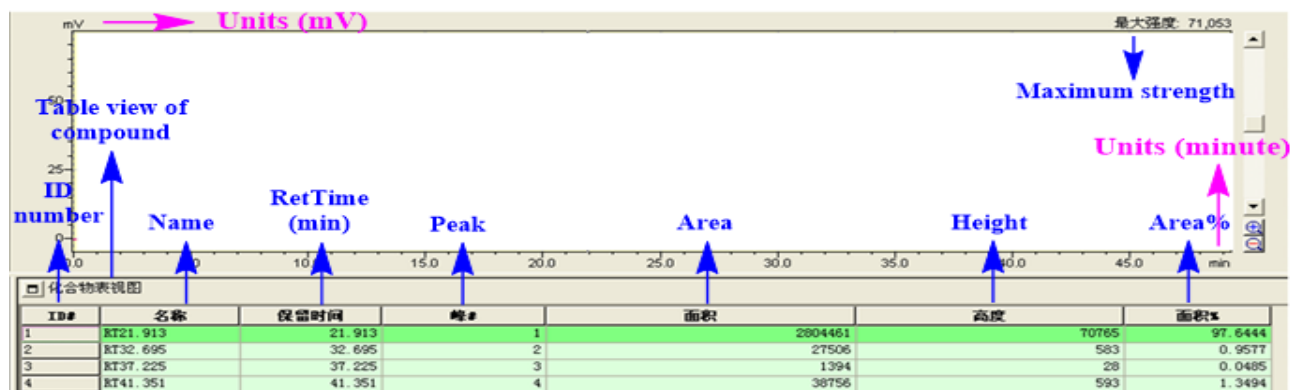

---



**(S,R)-5c:** (S)-2-((R)-(2-chlorophenyl)(hydroxy)methyl)cyclohexan-1-one (HPLC: Chiracel OD-H, detected at 220 nm, eluent: n-hexane/2-propanol = 99/1, flow rate = 1.0 mL/min, 25 °C).

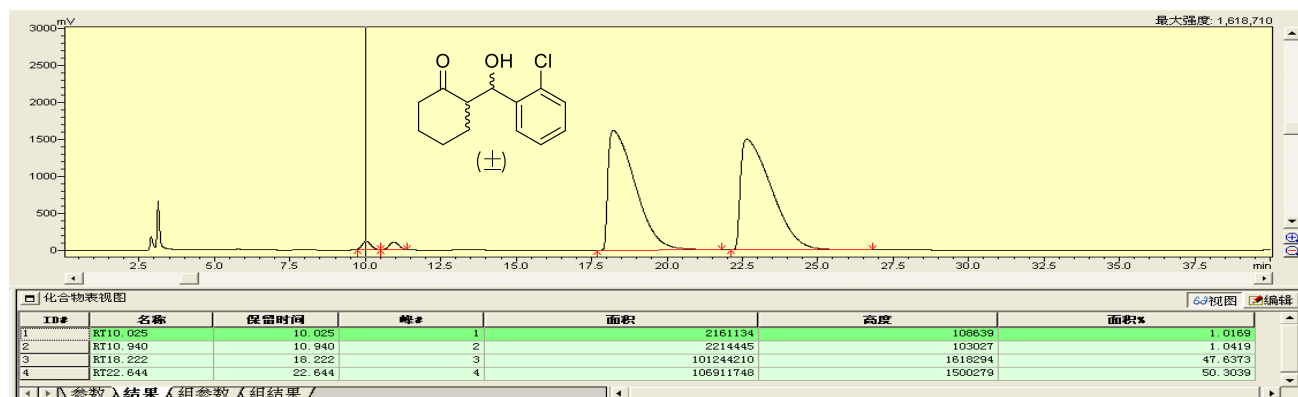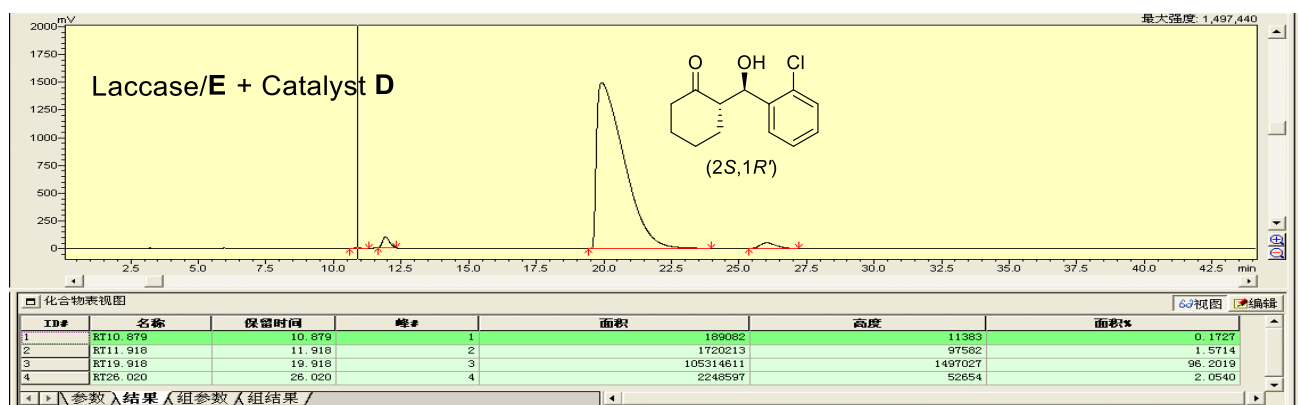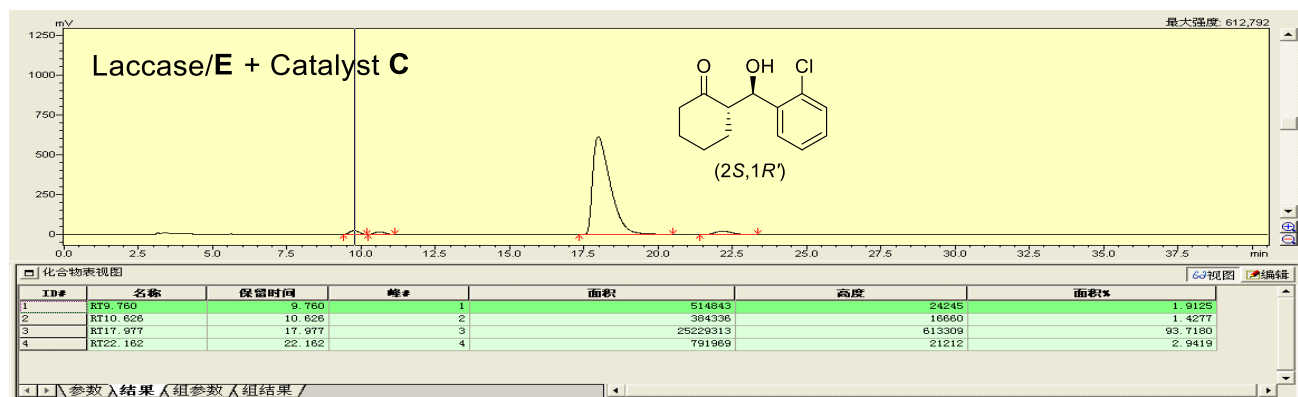

Translation of all characters (Chinese) in the above two frameworks to English is as follows:

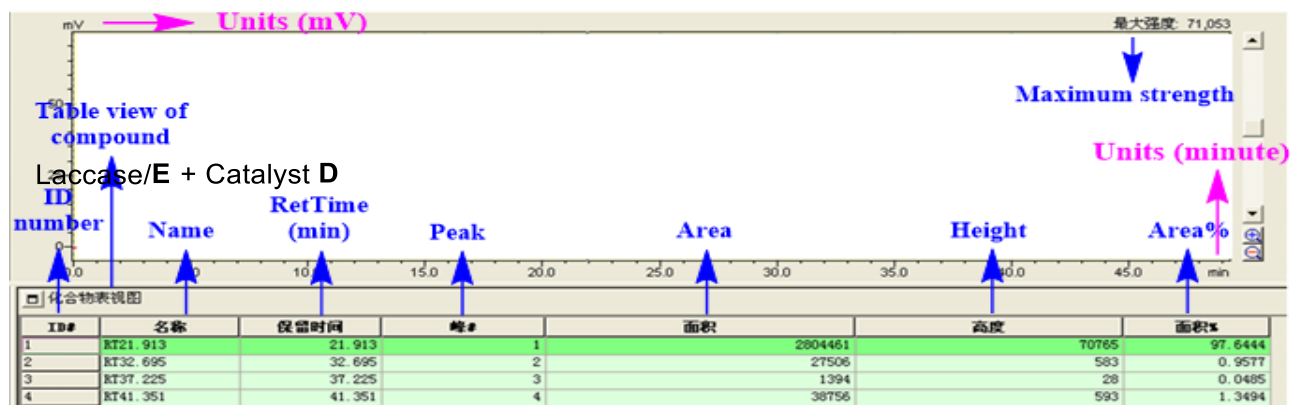

**(S,R)-5d:** (S)-2-((R)-(4-chlorophenyl)(hydroxy)methyl)cyclohexan-1-one.

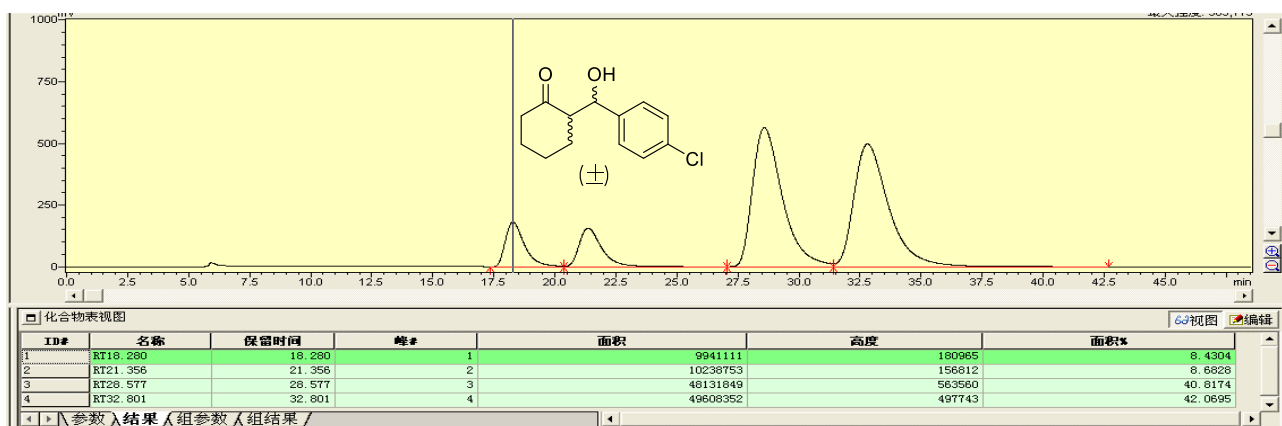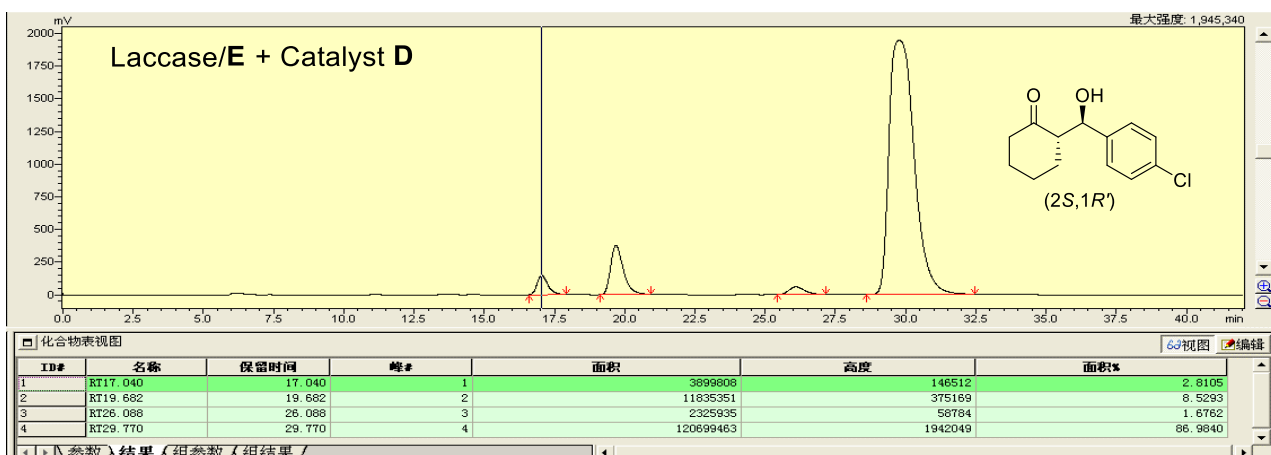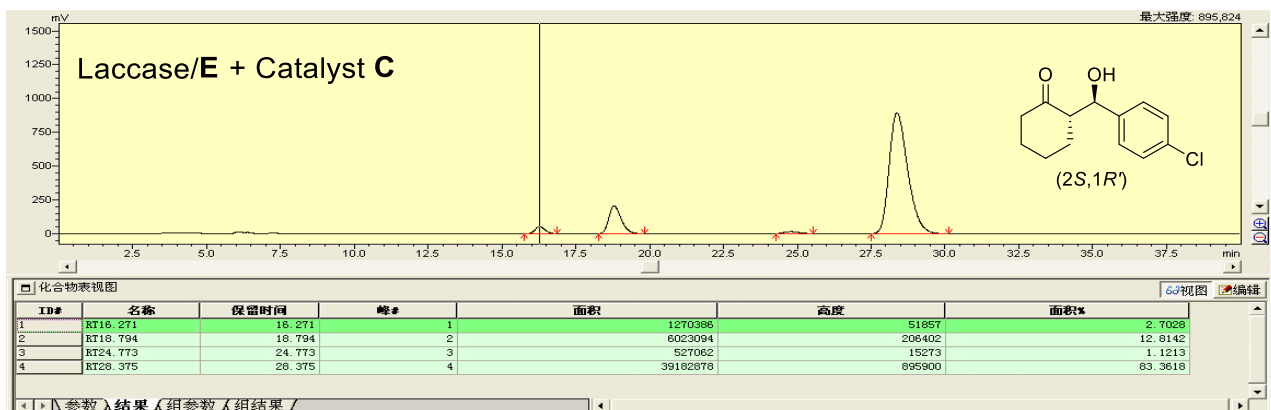

Translation of all characters (Chinese) in the above two frameworks to English is as follows:

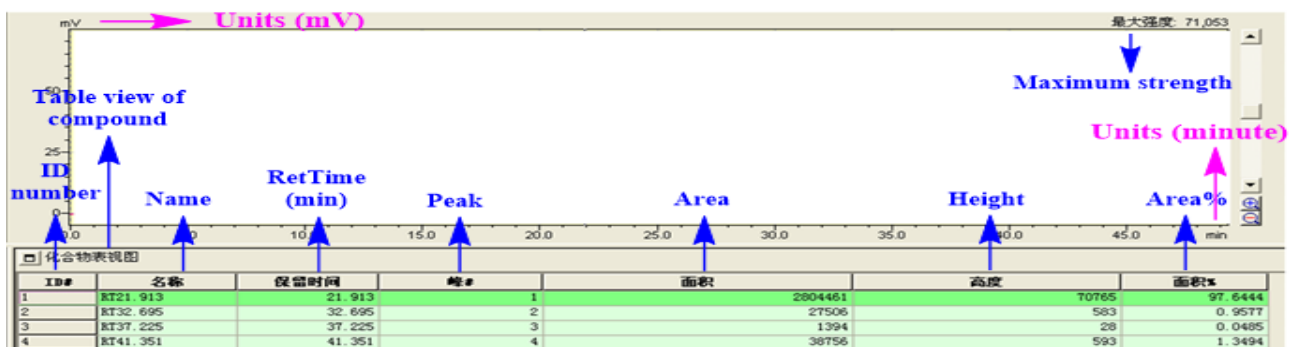

(*S,R*)-**5e**: (*S*)-2-((*R*)-(2-bromophenyl)(hydroxy)methyl)cyclohexan-1-one.

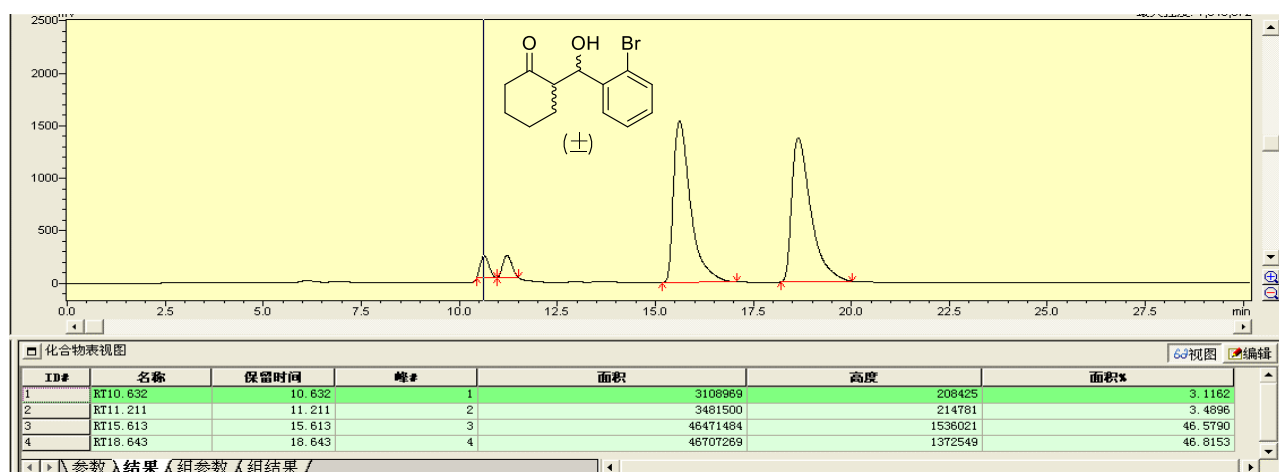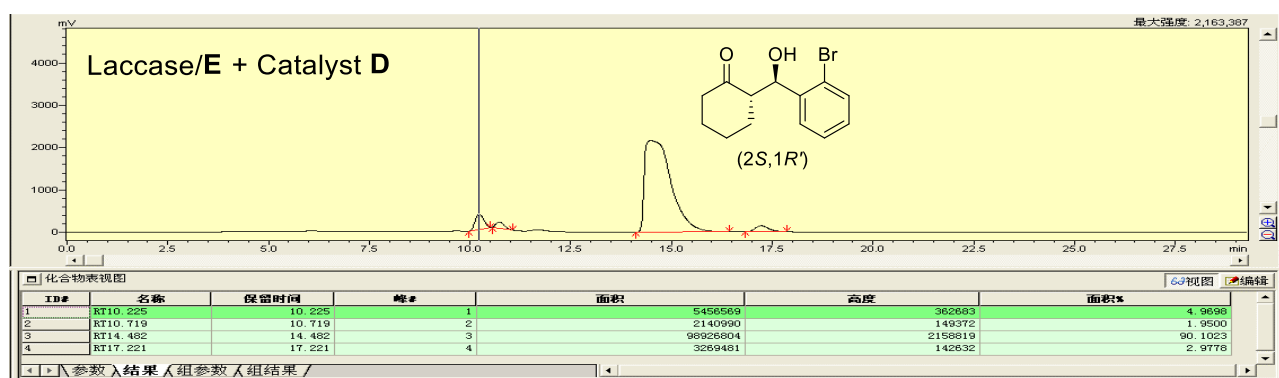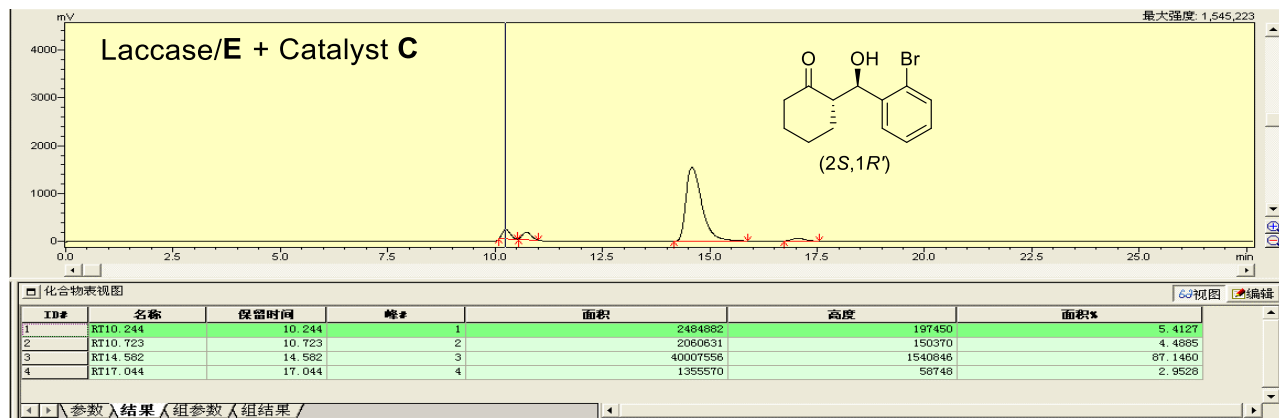

Translation of all characters (Chinese) in the above two frameworks to English is as follows:

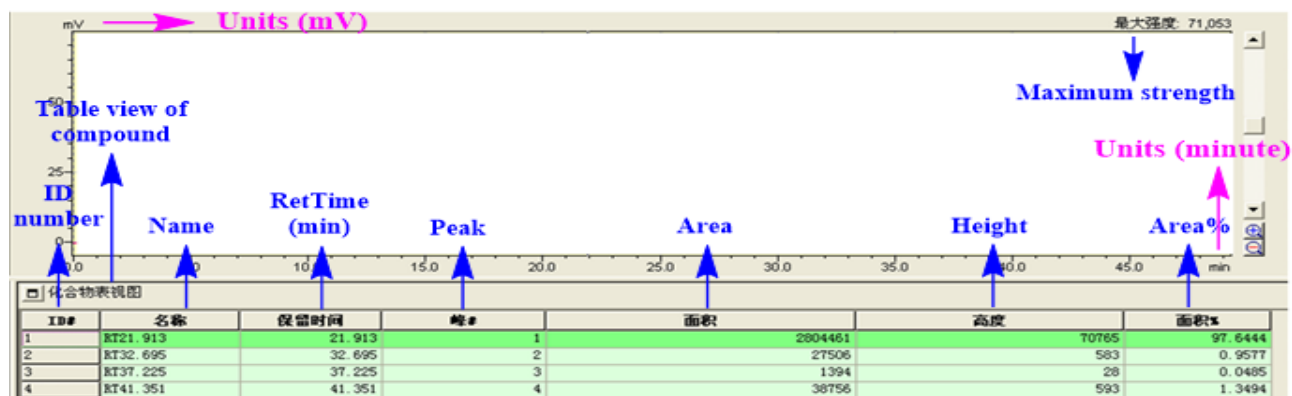

**(S,R)-5f:** (S)-2-((R)-(4-bromophenyl)(hydroxy)methyl)cyclohexan-1-one (HPLC: Chiracel AD-H, detected at 220 nm, eluent: n-hexane/2-propanol = 90/10, flow rate = 1.0 mL/min, 25 °C).

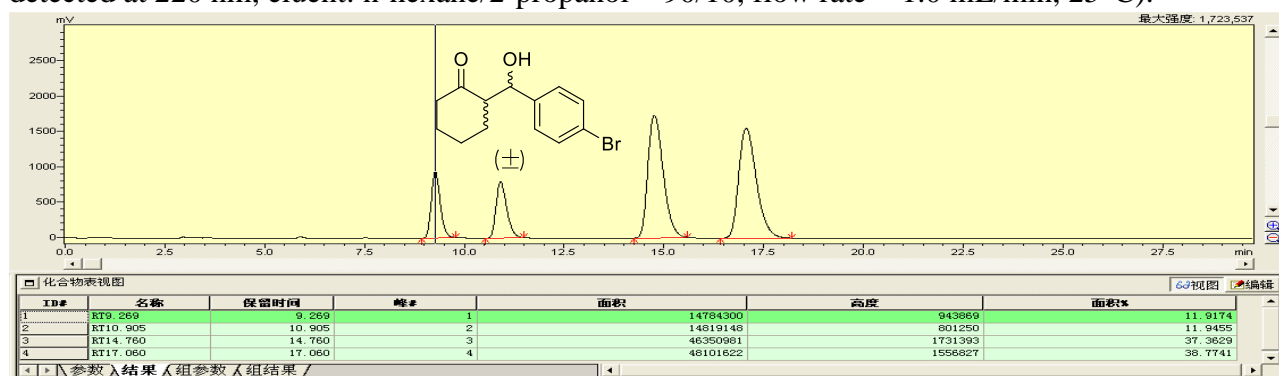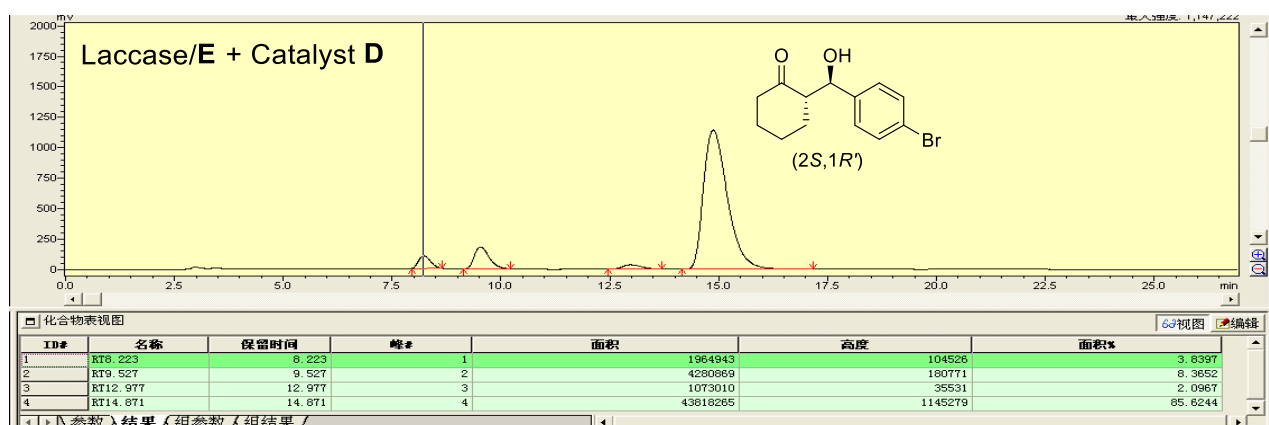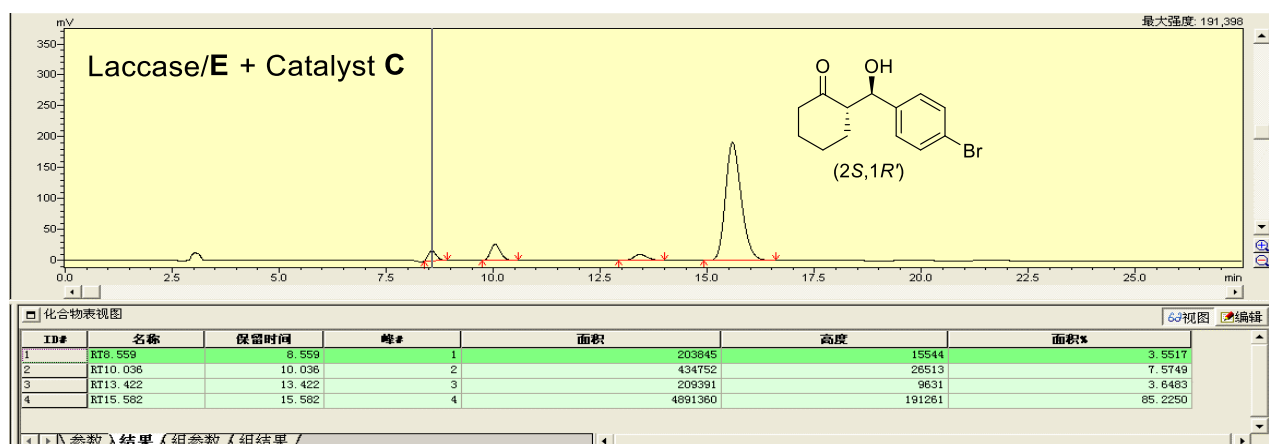

Translation of all characters (Chinese) in the above two frameworks to English is as follows:

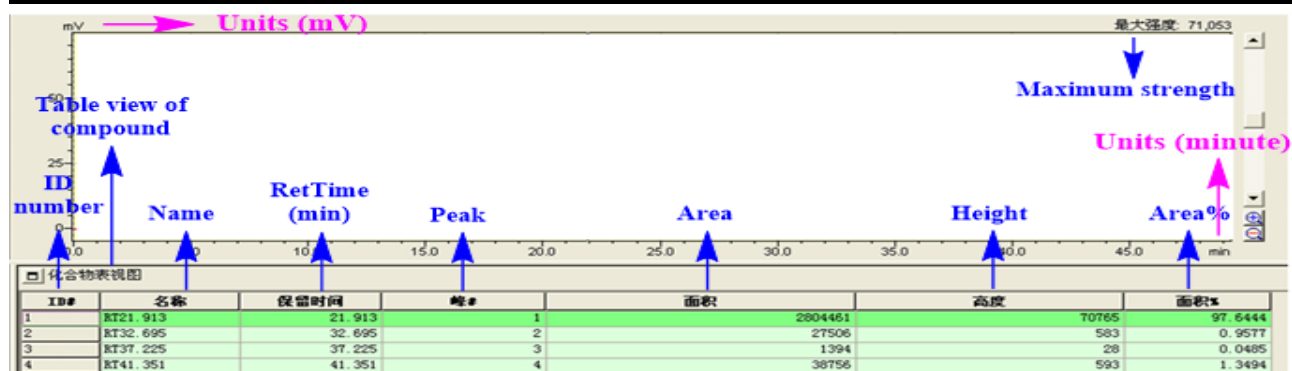

**(S,R)-5g:** (S)-2-((R)-hydroxy(4-(trifluoromethyl)phenyl)methyl)cyclohexan-1-one.

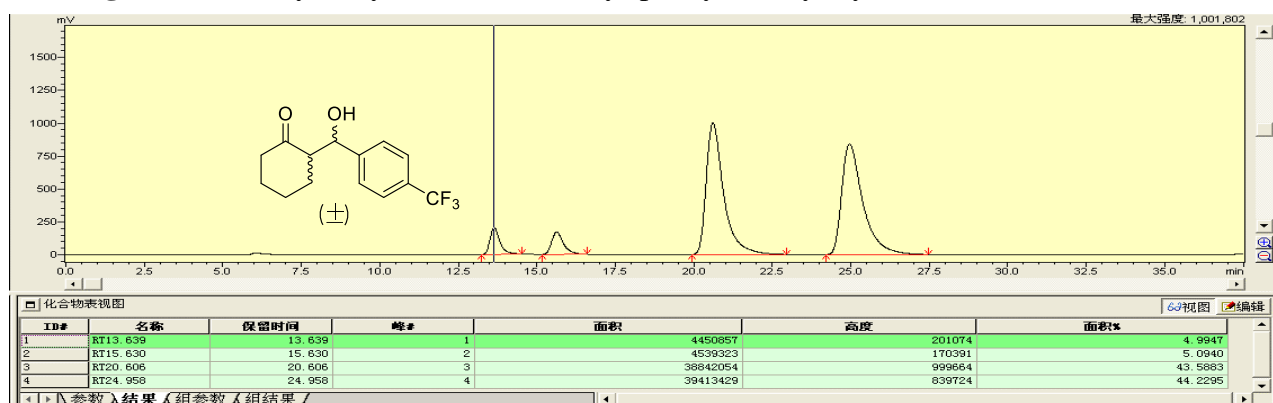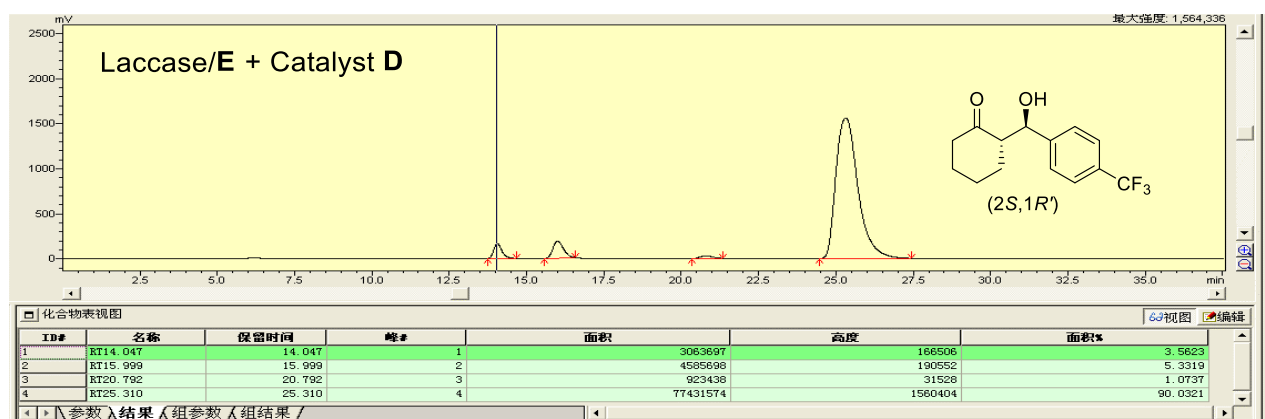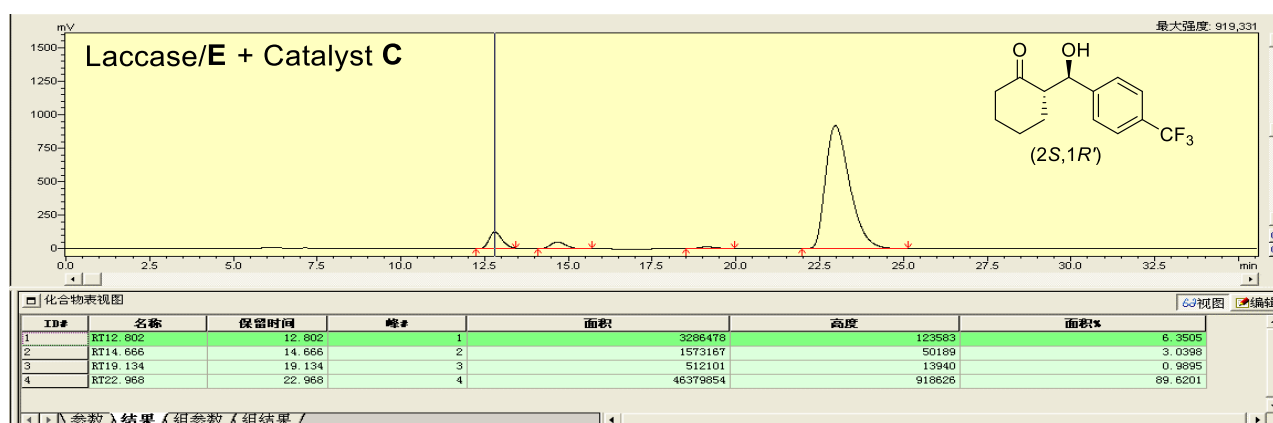

**Translation of all characters (Chinese) in the above two frameworks to English is as follows:**

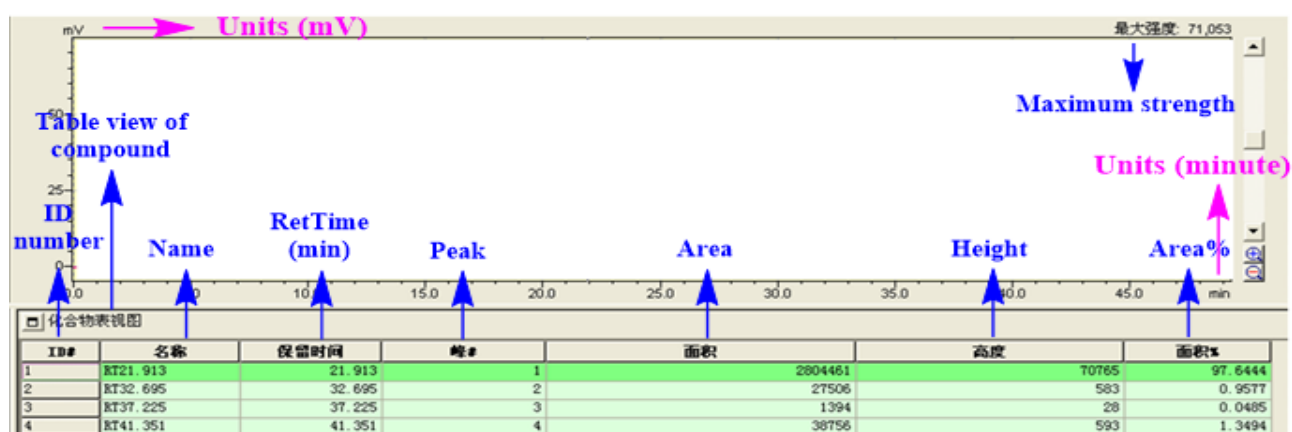

(*S,R*)-5h:(*S*)-2-((*R*)-hydroxy(2-nitrophenyl)methyl)cyclohexan-1-one.

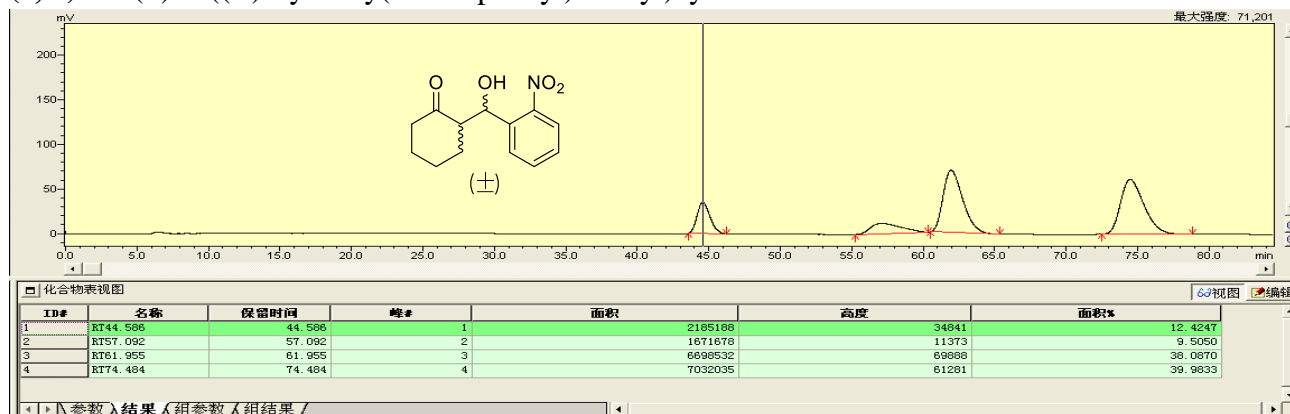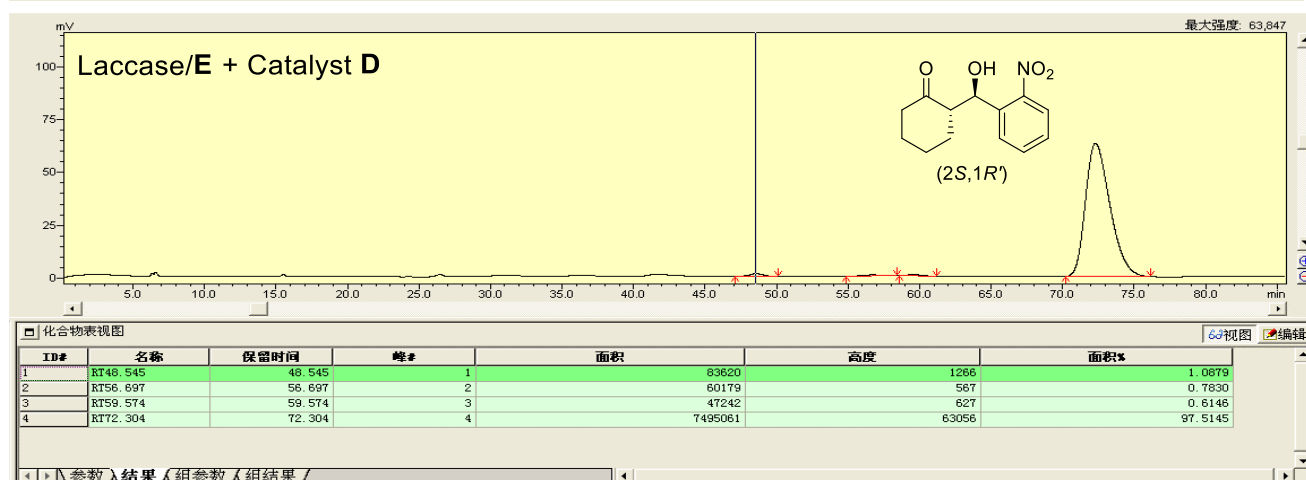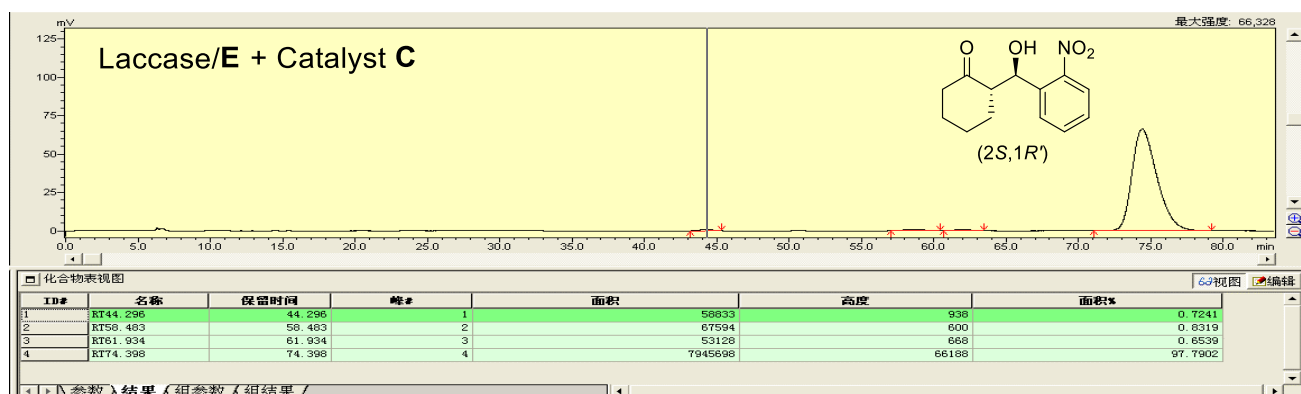

Translation of all characters (Chinese) in the above two frameworks to English is as follows:

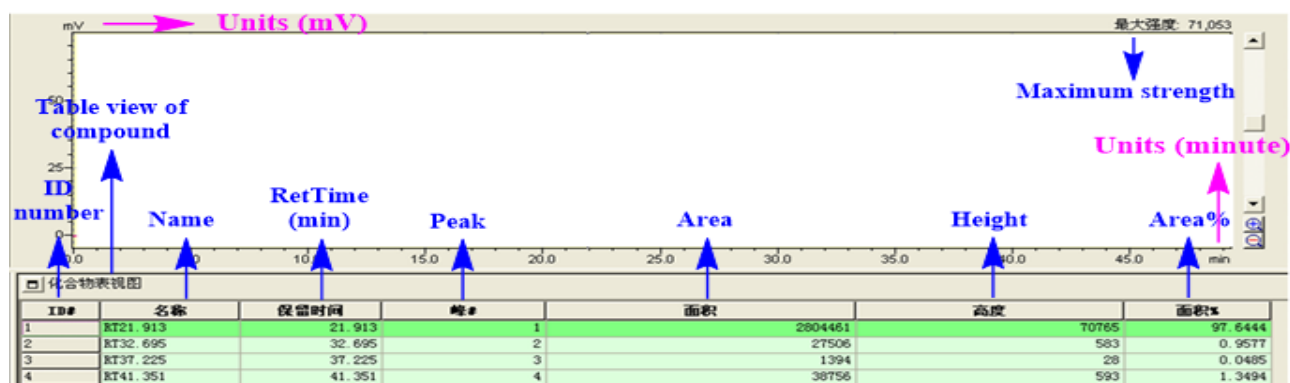

**(S,R)-5i:** (S)-2-((R)-hydroxy(3-nitrophenyl)methyl)cyclohexan-1-one.

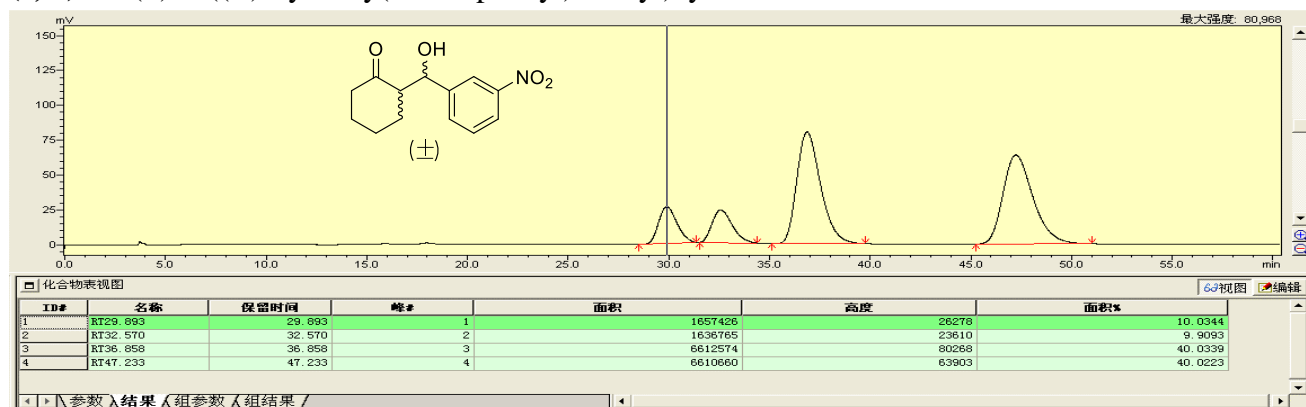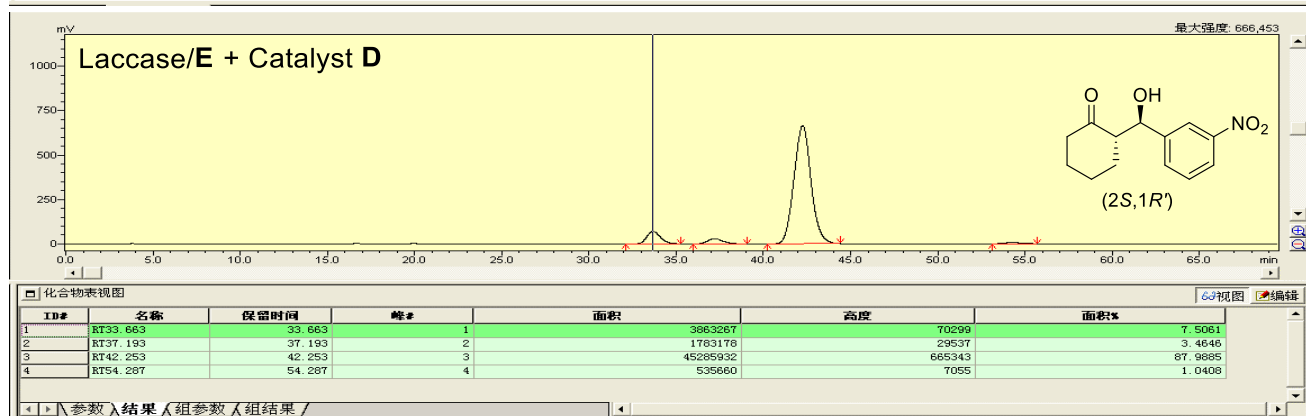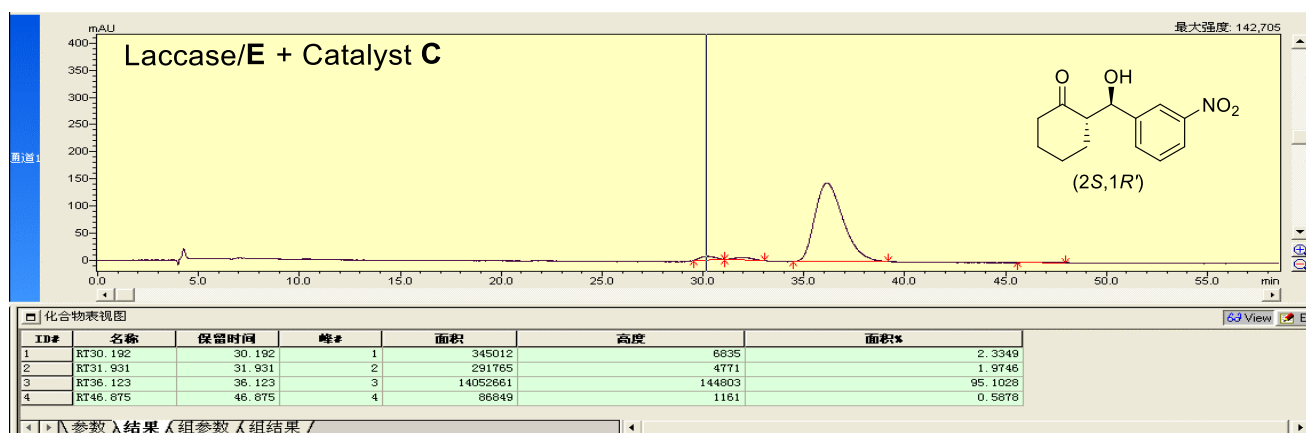

**Translation of all characters (Chinese) in the above two frameworks to English is as follows:**

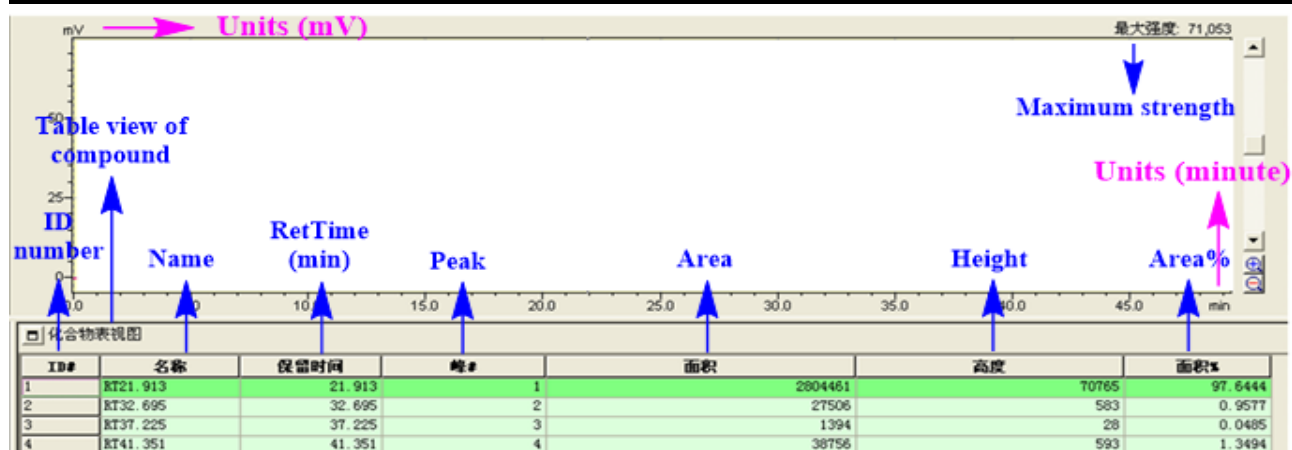



(*S,R*)-**5j**: (*S*)-2-((*R*)-hydroxy(4-nitrophenyl)methyl)cyclohexan-1-one.

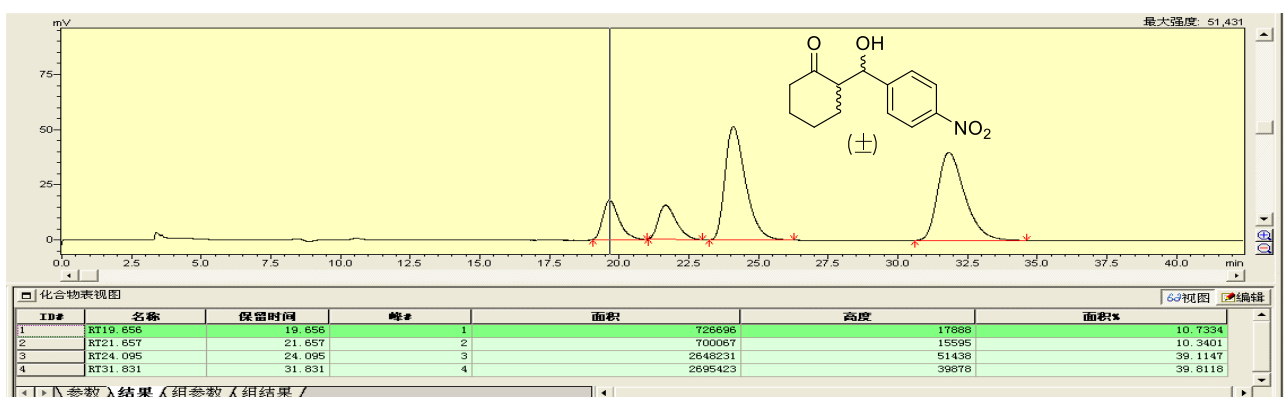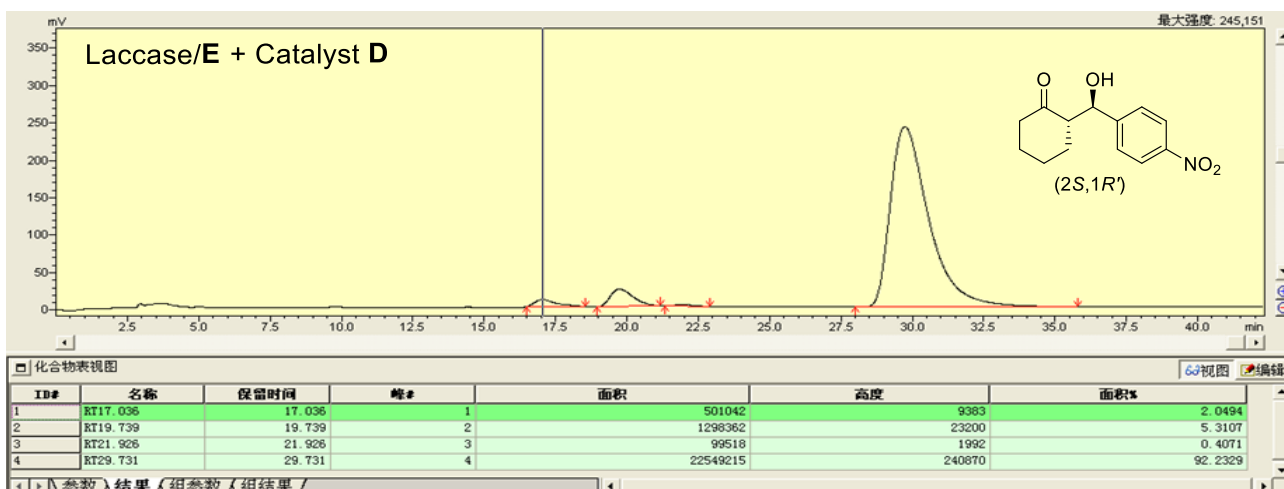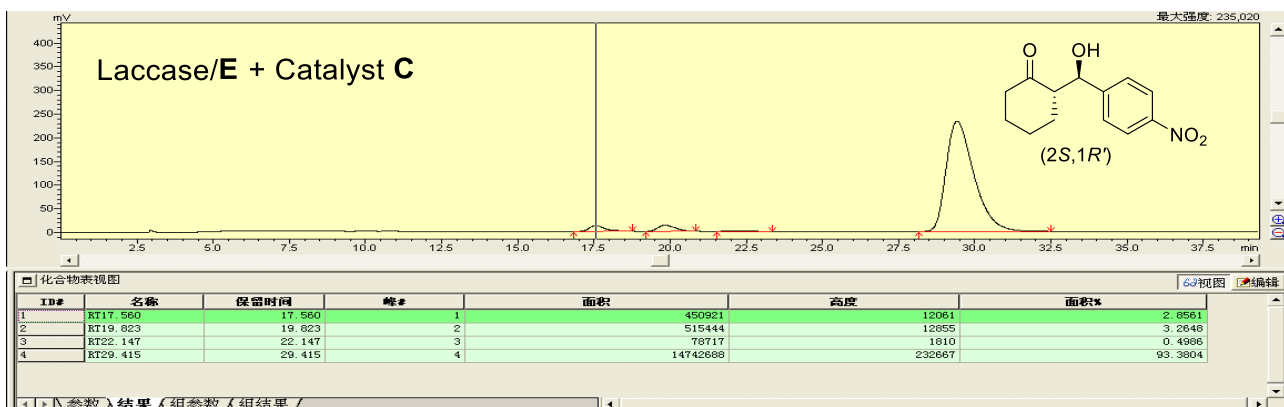

Translation of all characters (Chinese) in the above two frameworks to English is as follows:

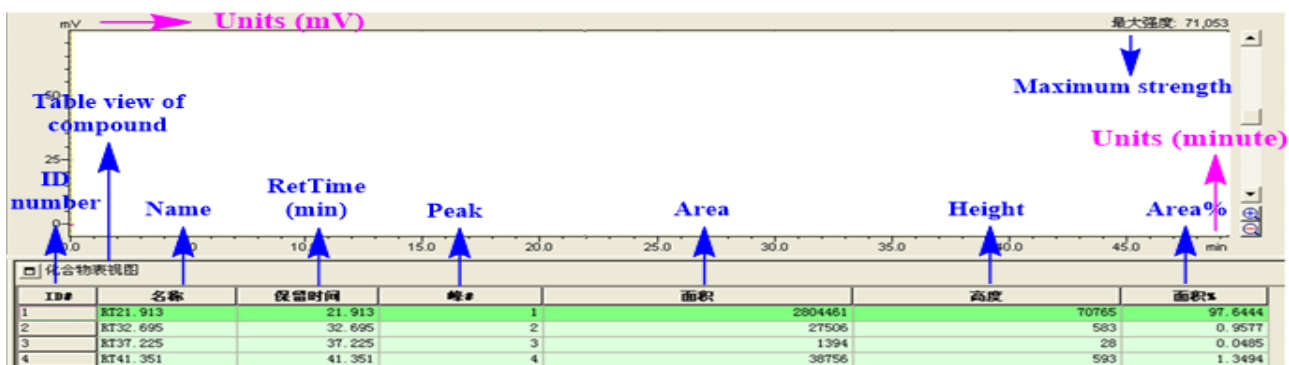



(*S,R*)-5k: 4-((*S*)-hydroxy((*R*)-2-oxocyclohexyl)methyl)benzonitrile.

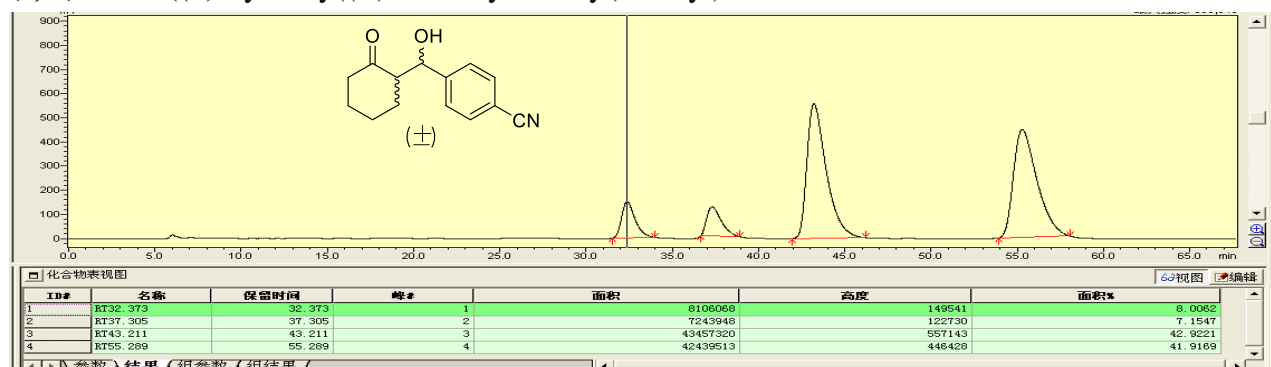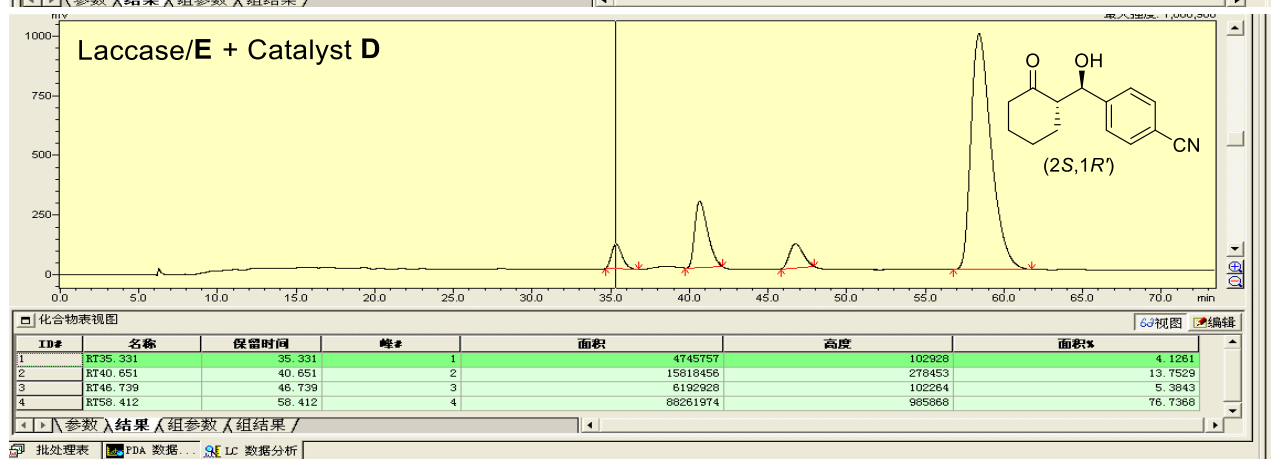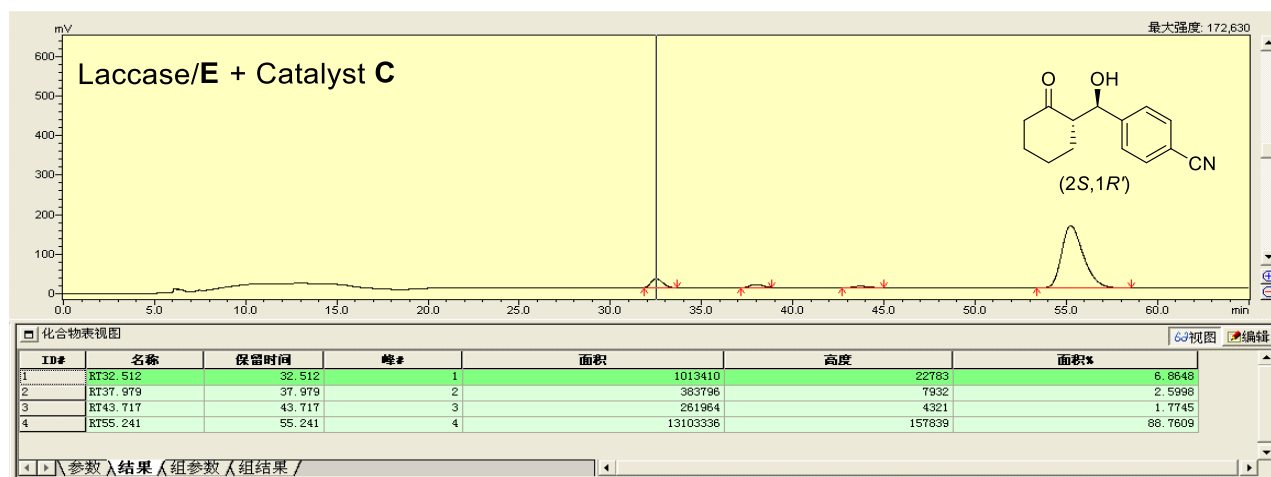

Translation of all characters (Chinese) in the above two frameworks to English is as follows:

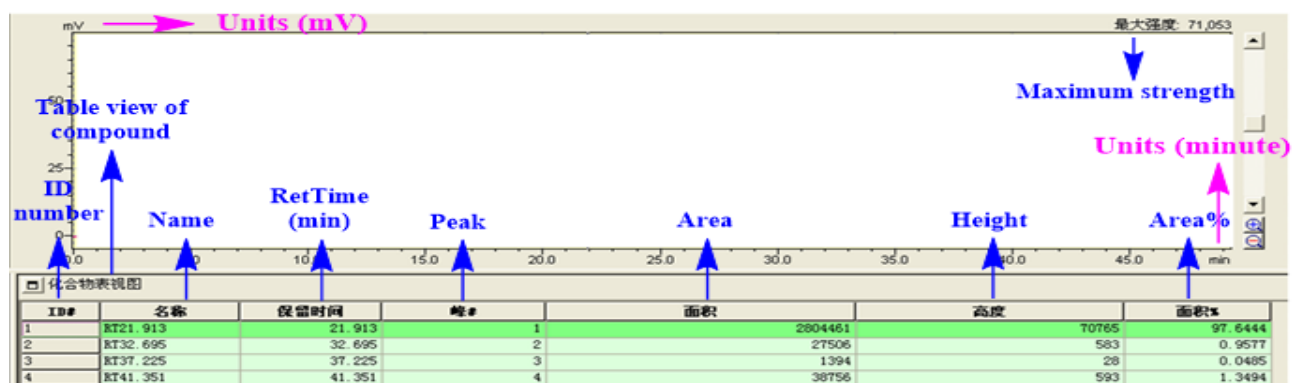

(*S,R*)-**5l**: (*S*)-2-((*R*)-hydroxy(*m*-tolyl)methyl)cyclohexan-1-one.

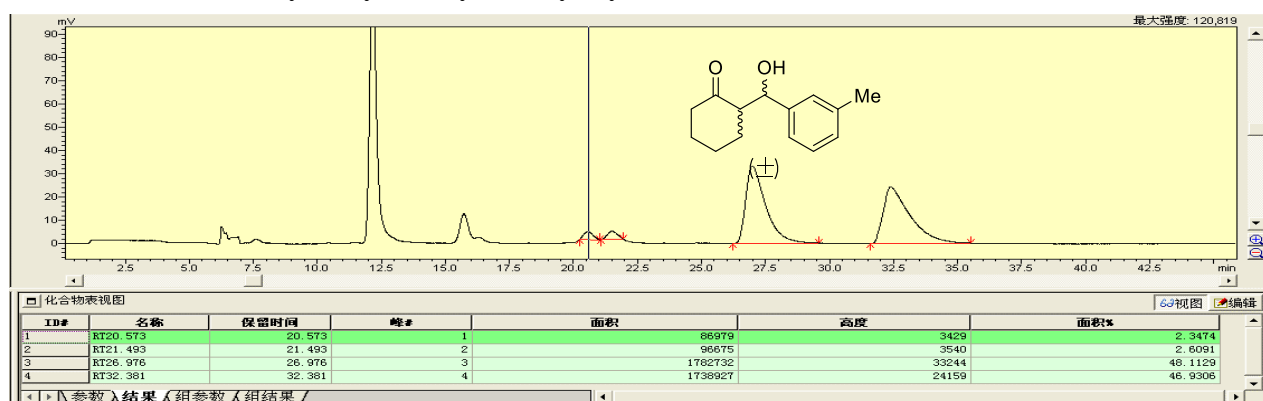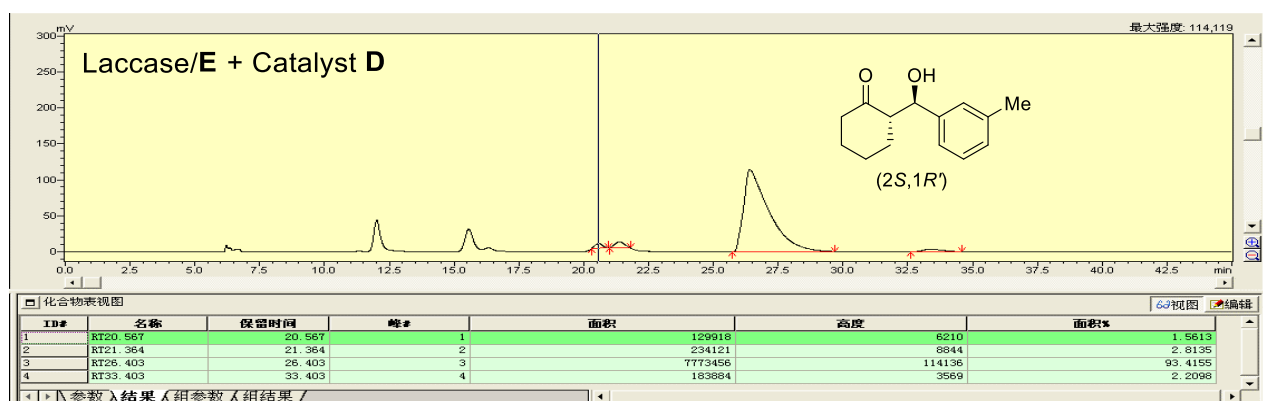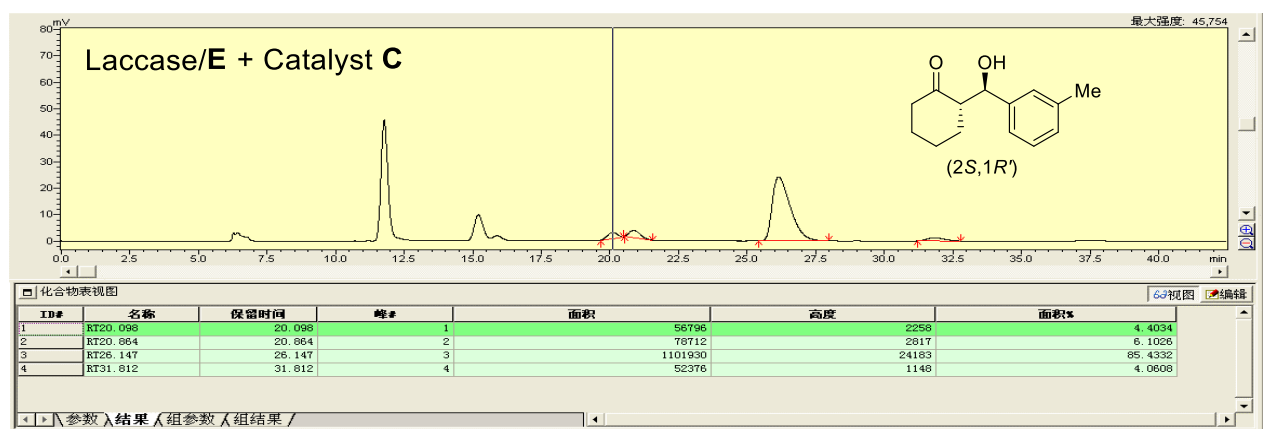

Translation of all characters (Chinese) in the above two frameworks to English is as follows:

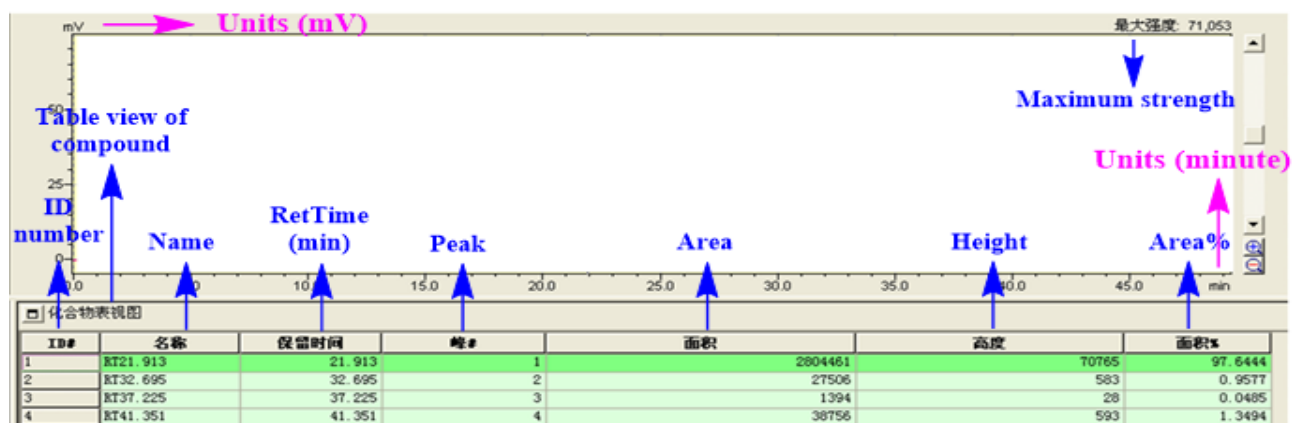

**(S,R)-5m:** (S)-2-((R)-hydroxy(p-tolyl)methyl)cyclohexan-1-one (HPLC: Chiracel OD-H, detected at 254 nm, eluent: n-hexane/2-propanol = 97/3, flow rate = 0.5 mL/min, 25 °C).

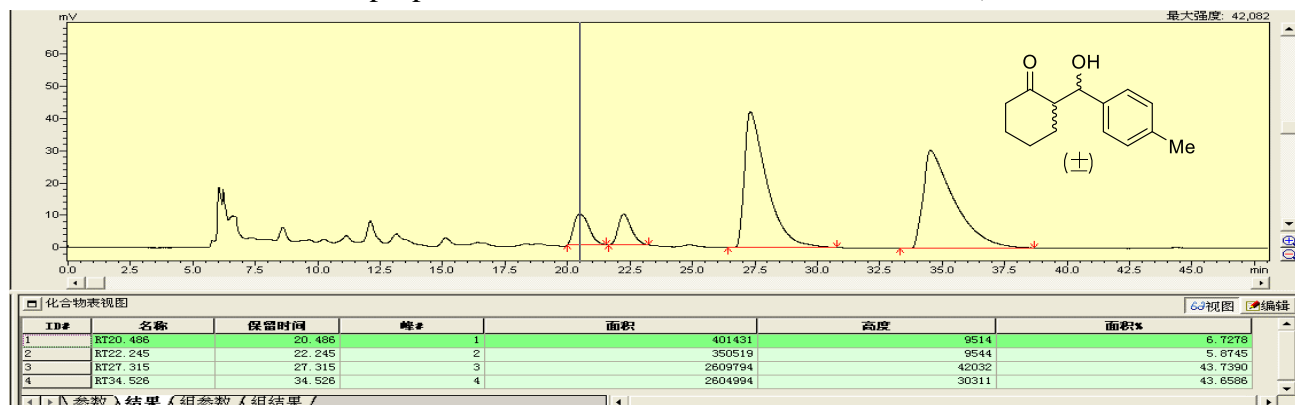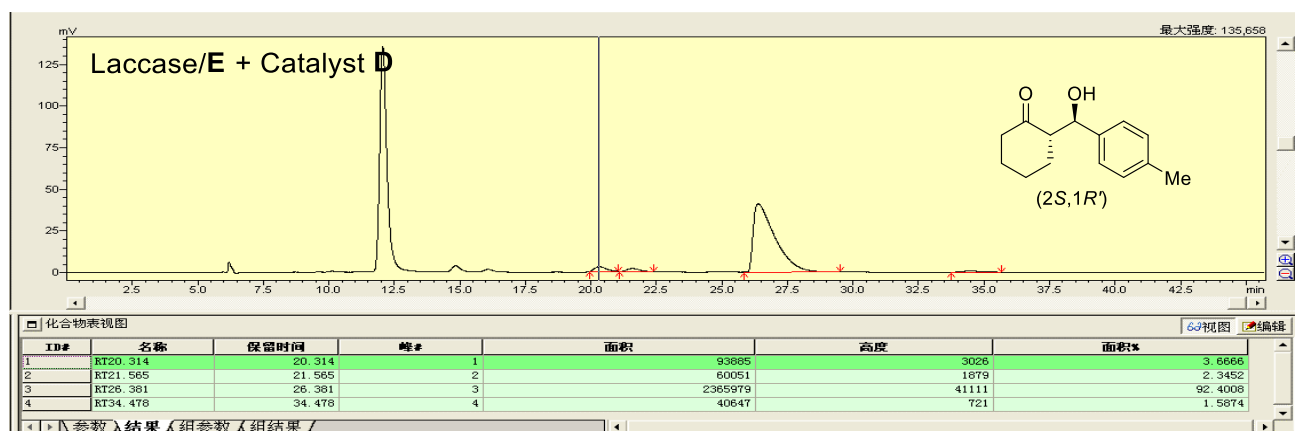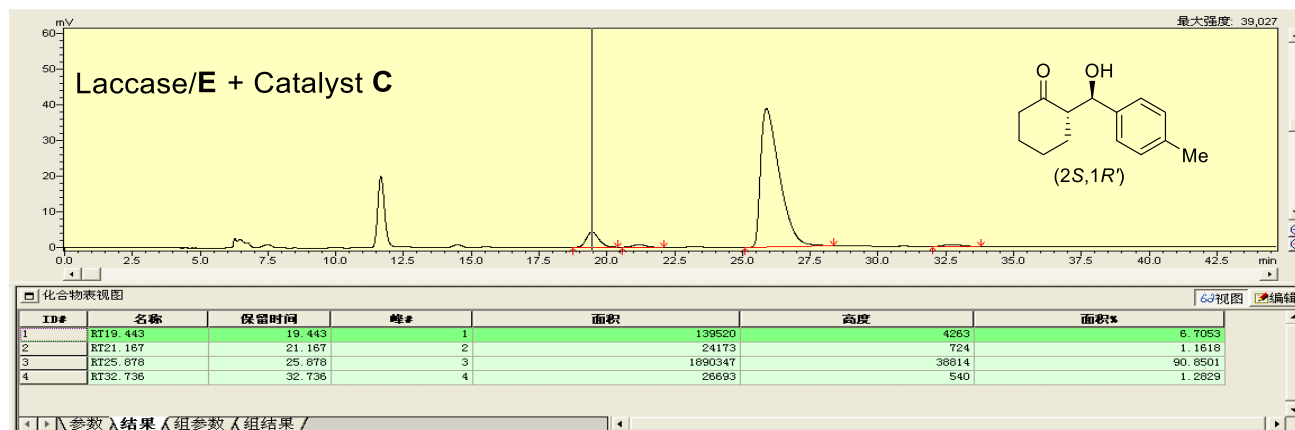

**Translation of all characters (Chinese) in the above two frameworks to English is as follows:**

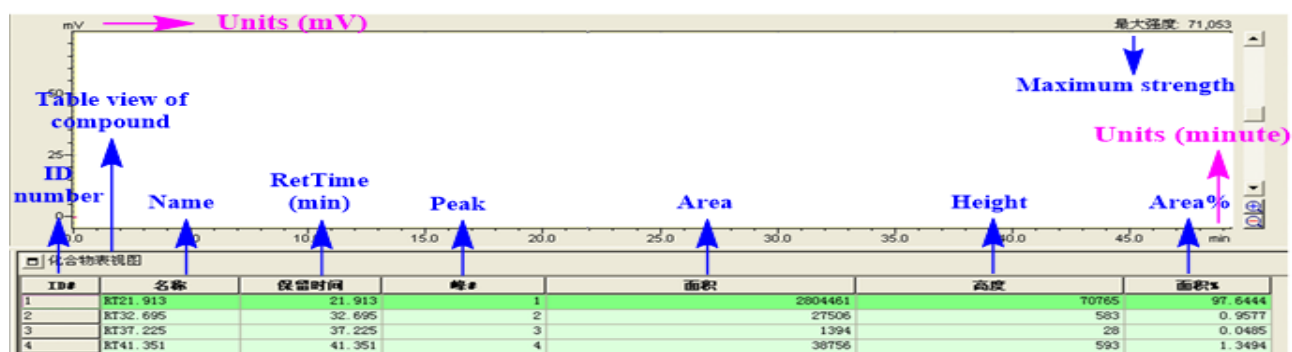

(*S,R*)-5n: (S)-2-((R)-furan-2-yl(hydroxy)methyl)cyclohexan-1-one.

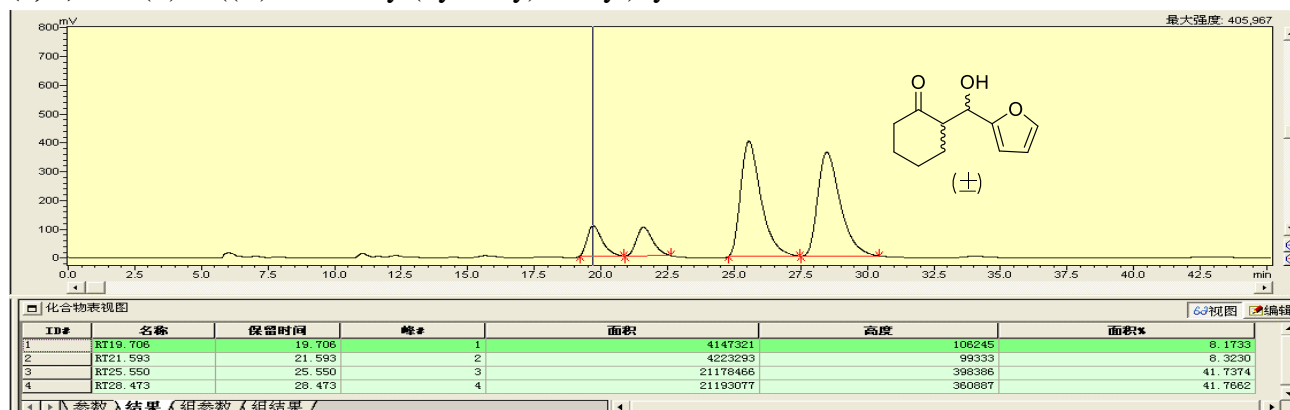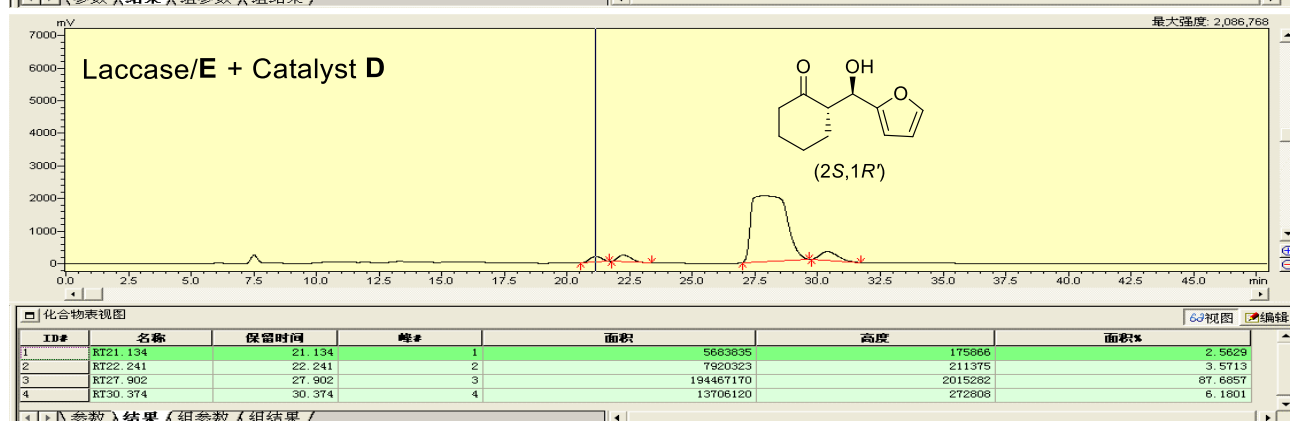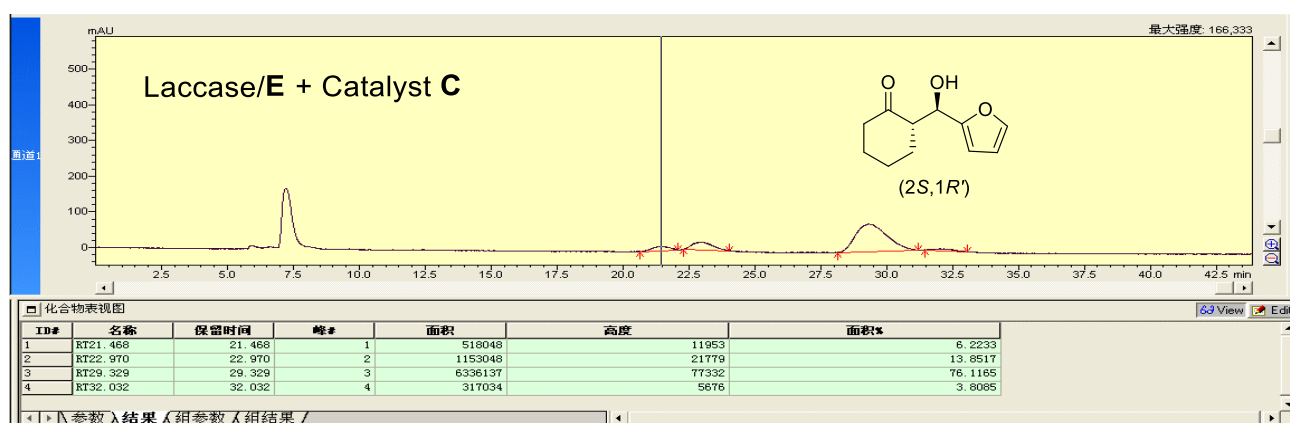

Translation of all characters (Chinese) in the above two frameworks to English is as follows:

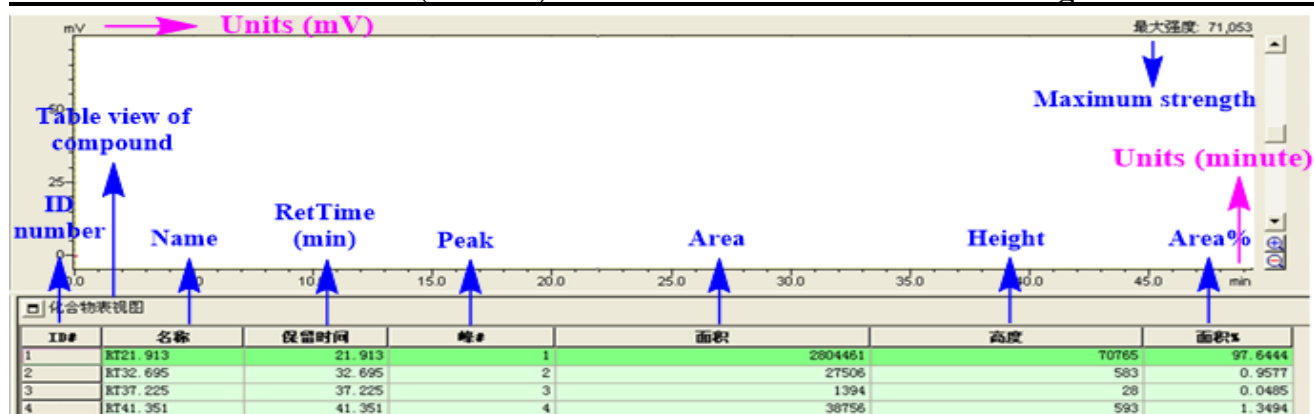

**(S,R)-5o:** (S)-2-((R)-hydroxy(thiophen-2-yl)methyl)cyclohexan-1-one.

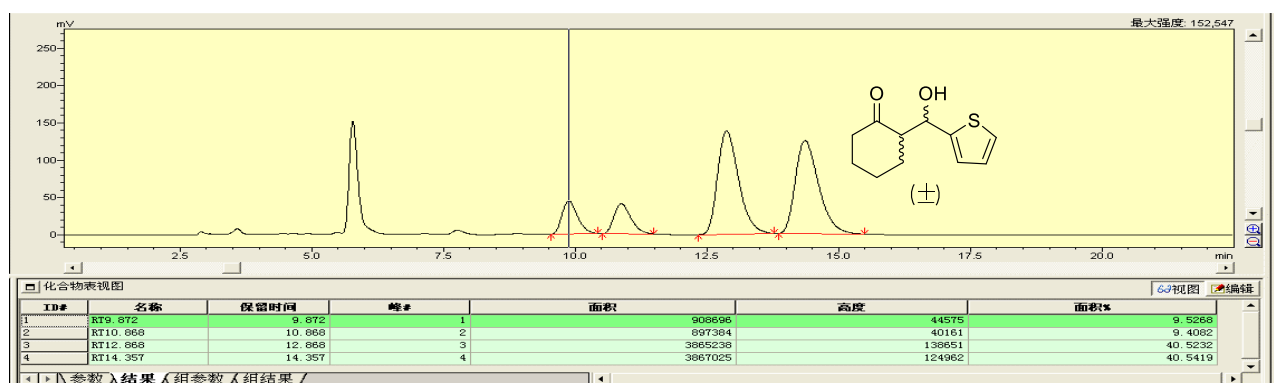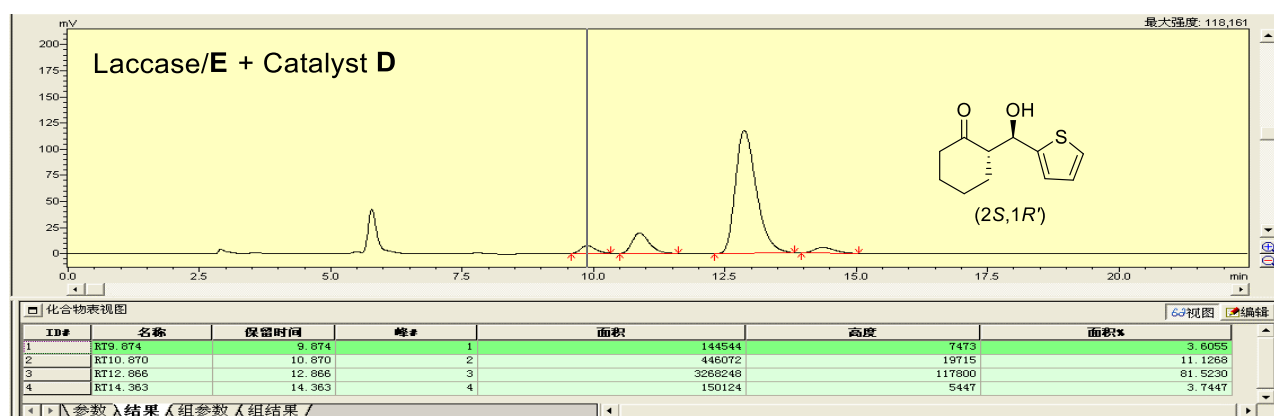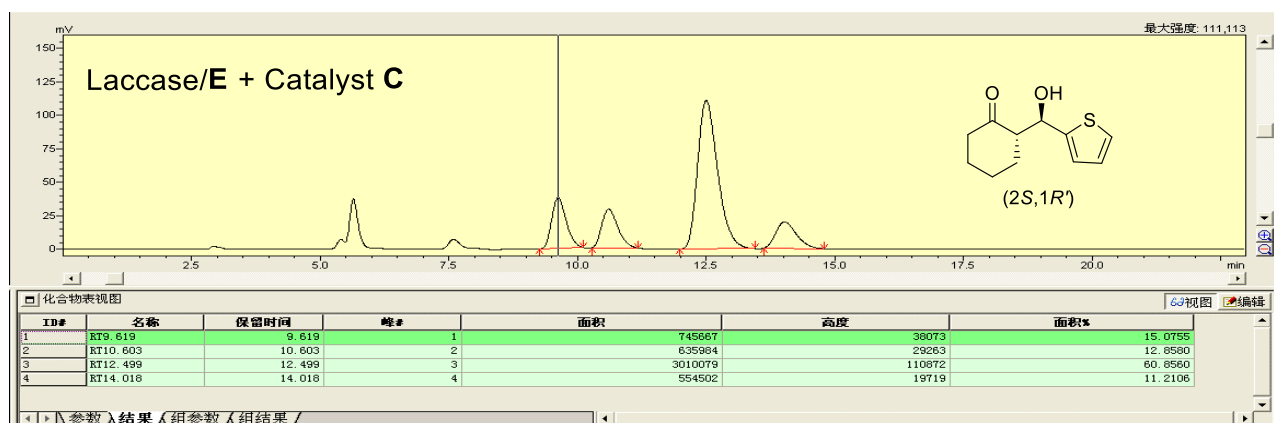

**Translation of all characters (Chinese) in the above two frameworks to English is as follows:**

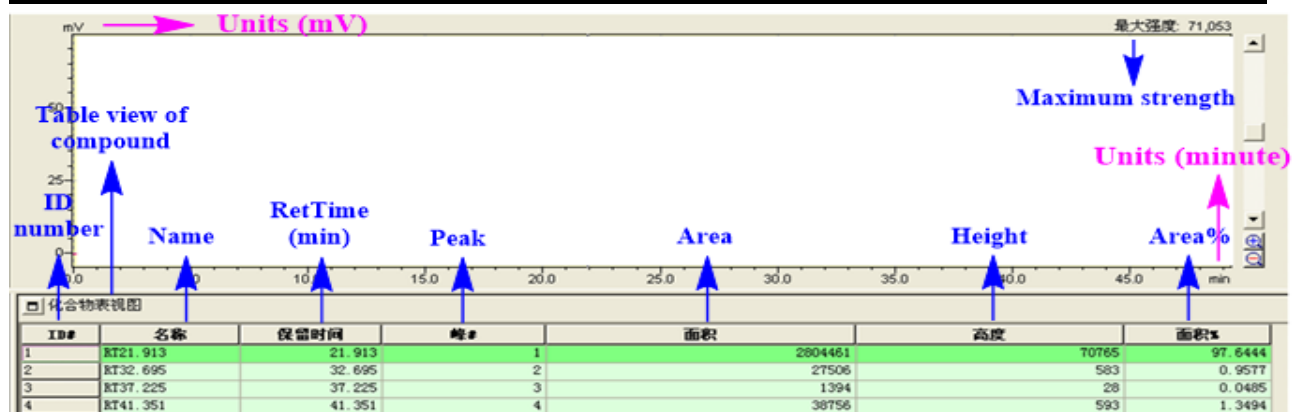

**(S,R)-5p:** (S)-2-((R)-hydroxy(naphthalen-1-yl)methyl)cyclohexan-1-one.

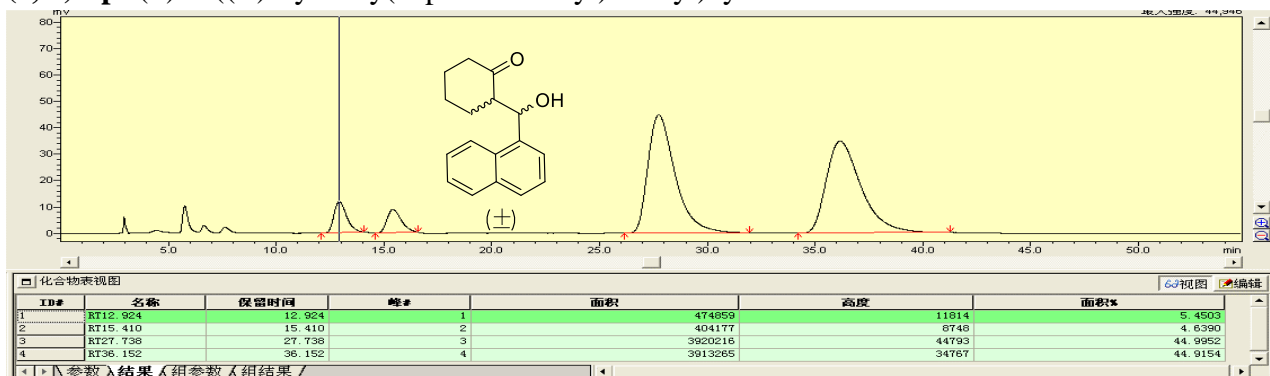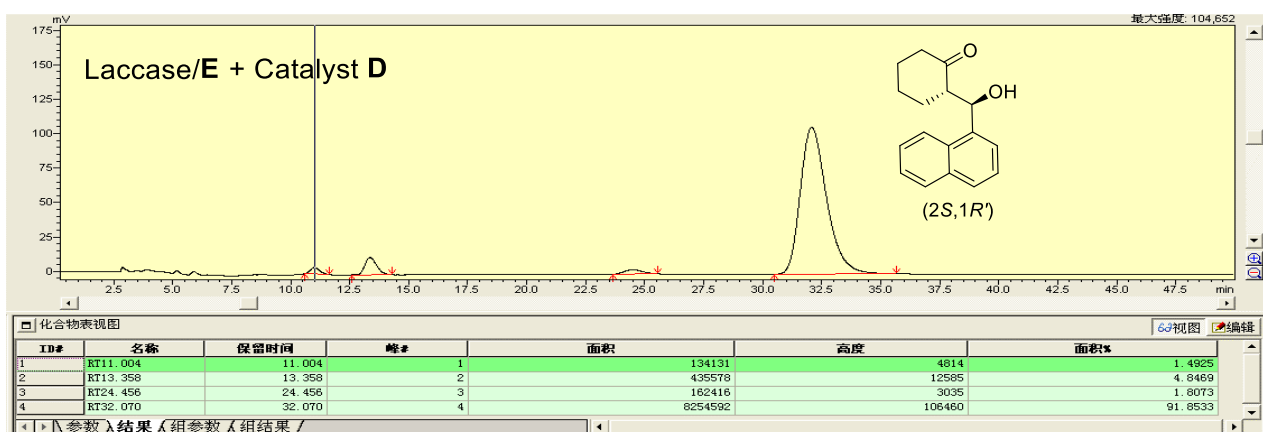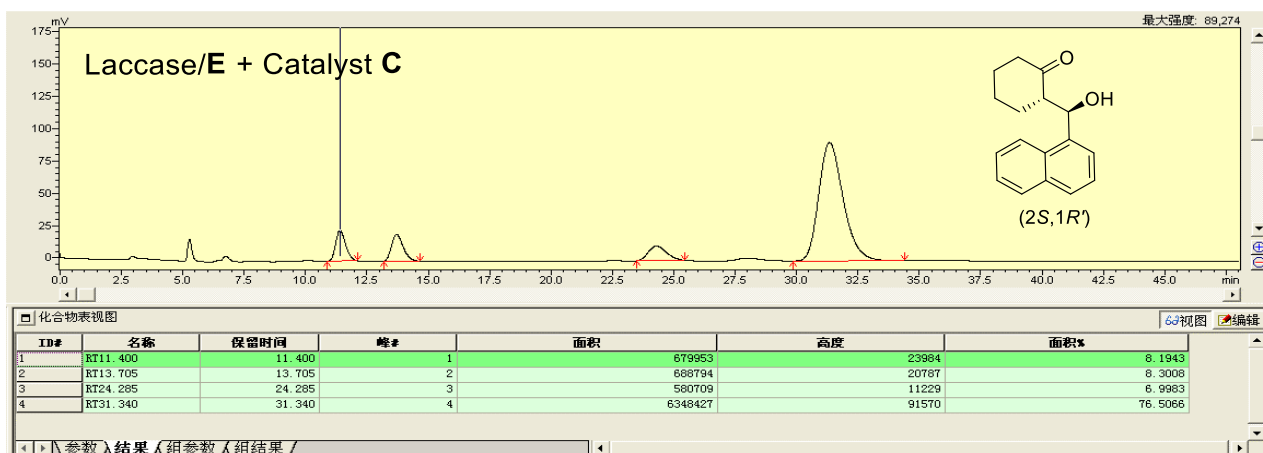

Translation of all characters (Chinese) in the above two frameworks to English is as follows:

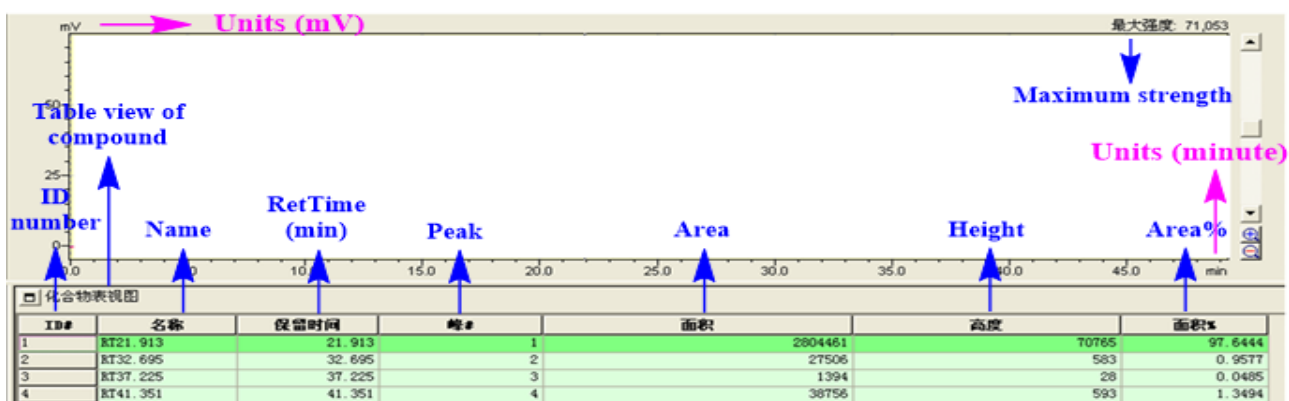

**Figure S2. Characterization of chiral products (The  $^1\text{H}$  NMR of all chiral products).**

**(*S,R*)-5a:** (*S*)-2-((*R*)-hydroxy(phenyl)methyl)cyclohexan-1-one.

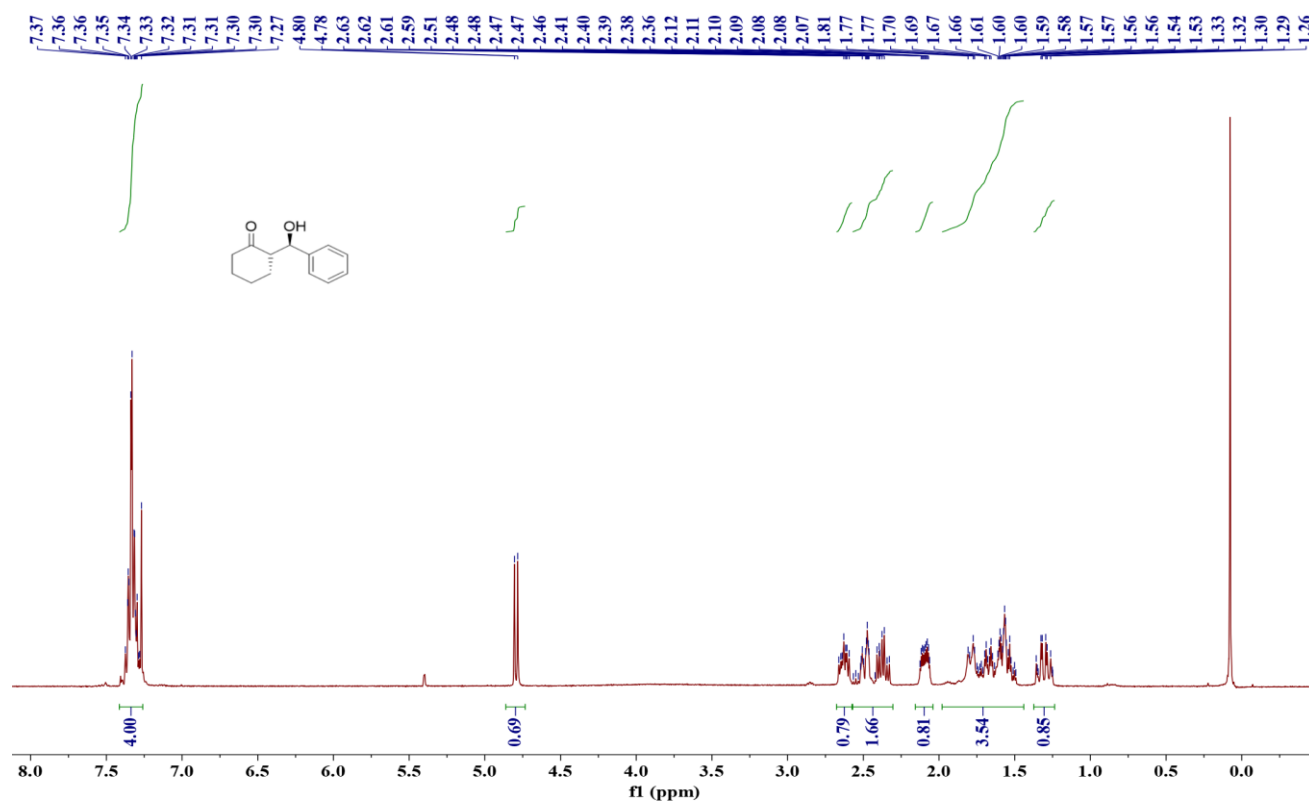

**(*S,R*)-5b:** (*S*)-2-((*R*)-(2-fluorophenyl)(hydroxy)methyl)cyclohexan-1-one.

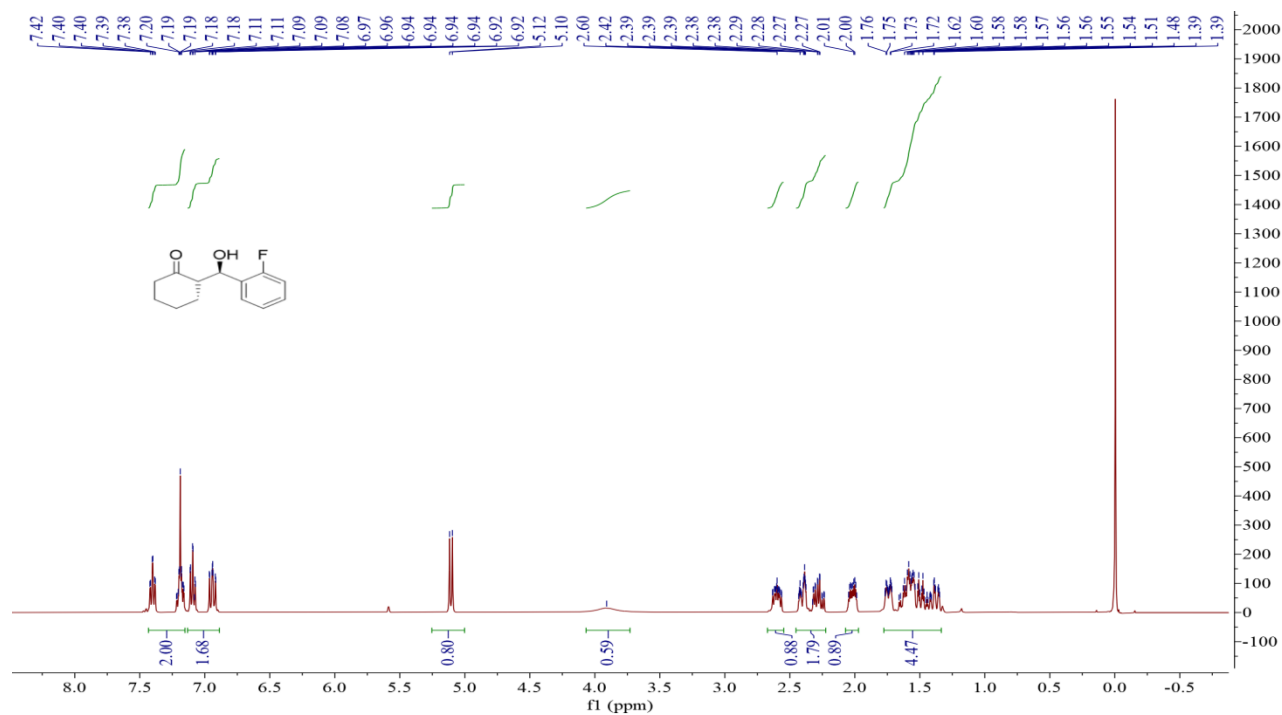

**(*S,R*)-5c:** (*S*)-2-((*R*)-(2-chlorophenyl)(hydroxy)methyl)cyclohexan-1-one.

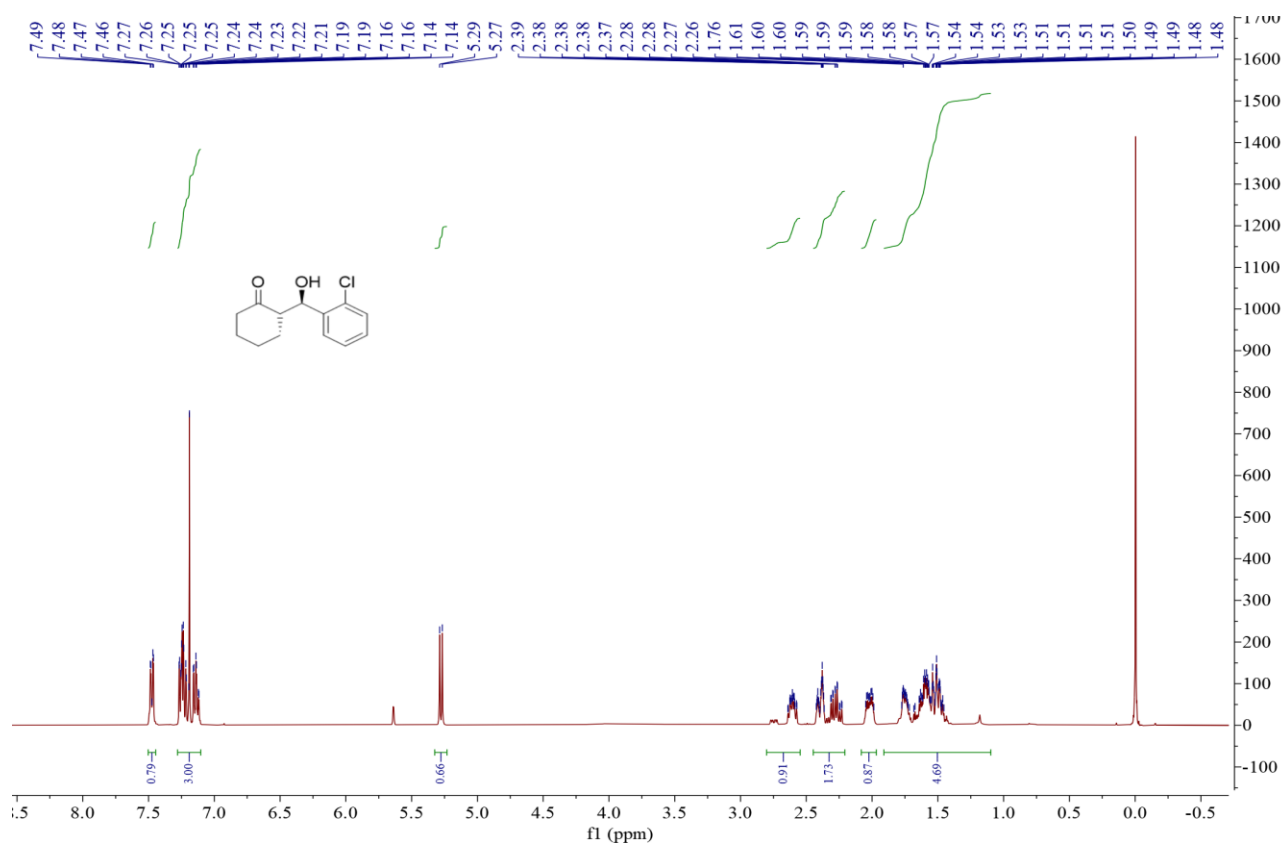

**(*S,R*)-5d:** (*S*)-2-((*R*)-(4-chlorophenyl)(hydroxy)methyl)cyclohexan-1-one.

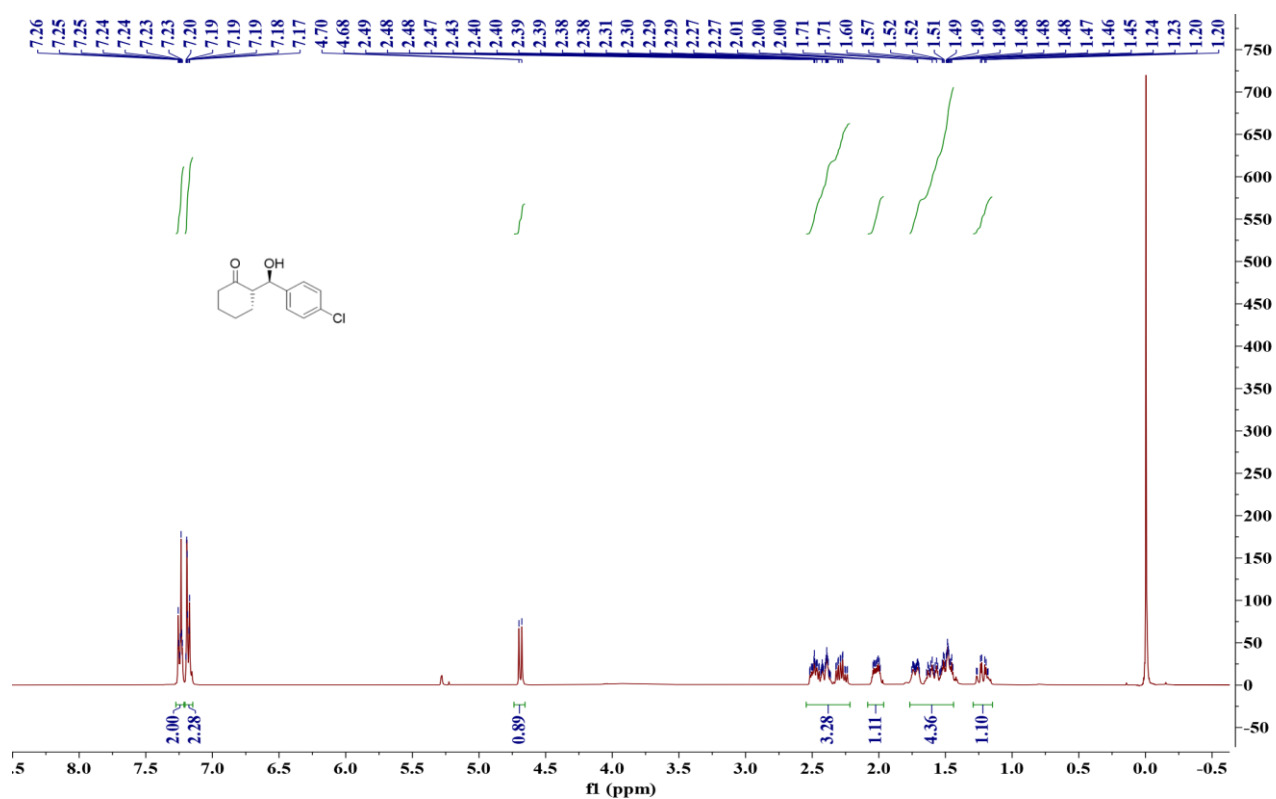



**(*S,R*)-5e:** (*S*)-2-((*R*)-(2-bromophenyl)(hydroxy)methyl)cyclohexan-1-one.

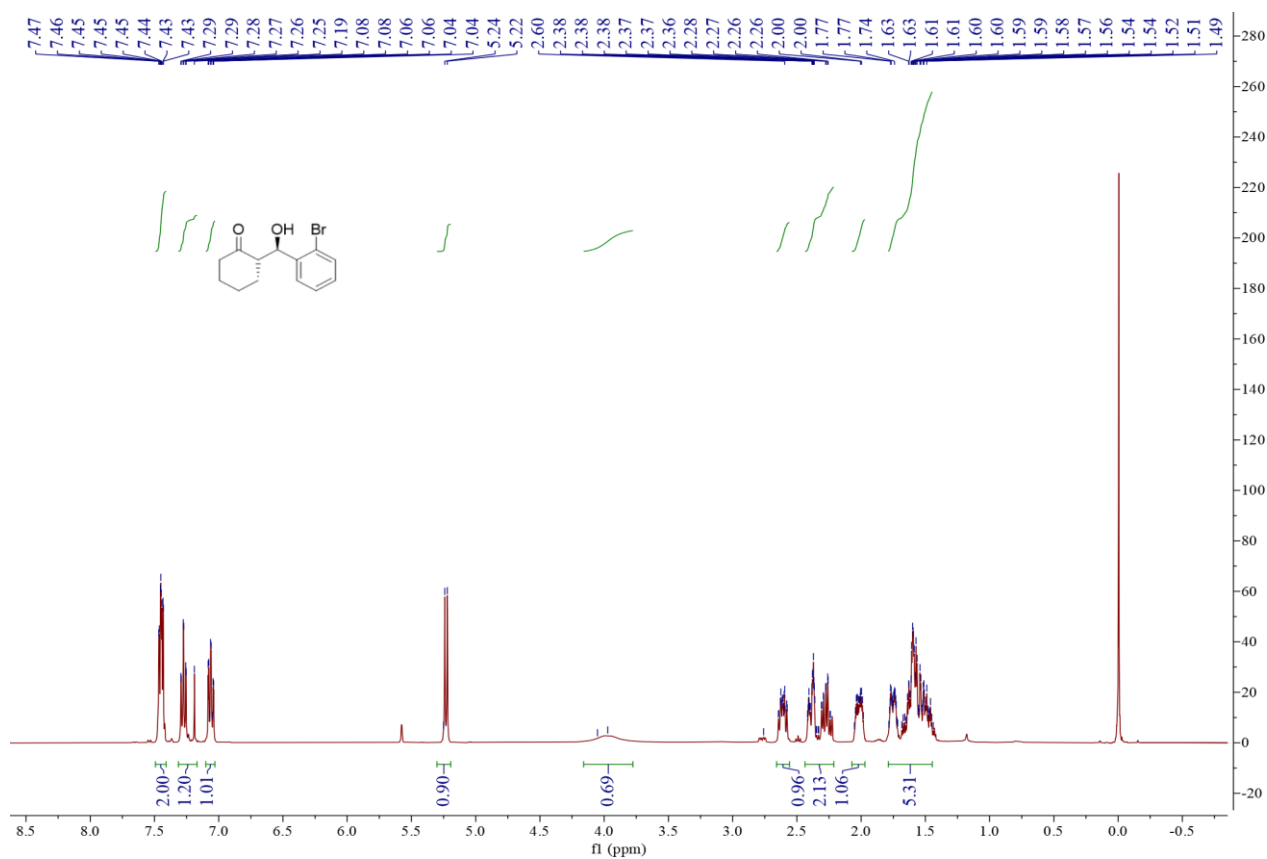

**(*S,R*)-5f:** (*S*)-2-((*R*)-(4-bromophenyl)(hydroxy)methyl)cyclohexan-1-one.

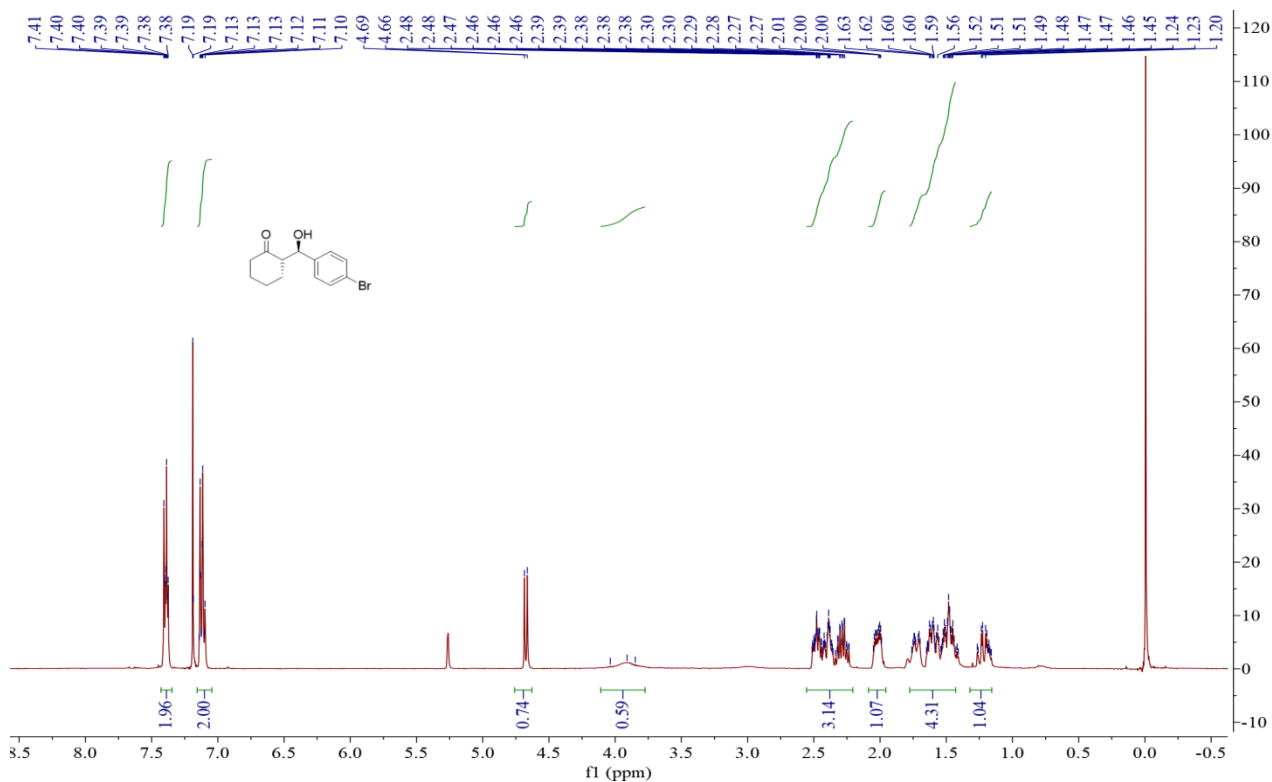

**(S,R)-5g:** (S)-2-((R)-hydroxy(4-(trifluoromethyl)phenyl)methyl)cyclohexan-1-one.

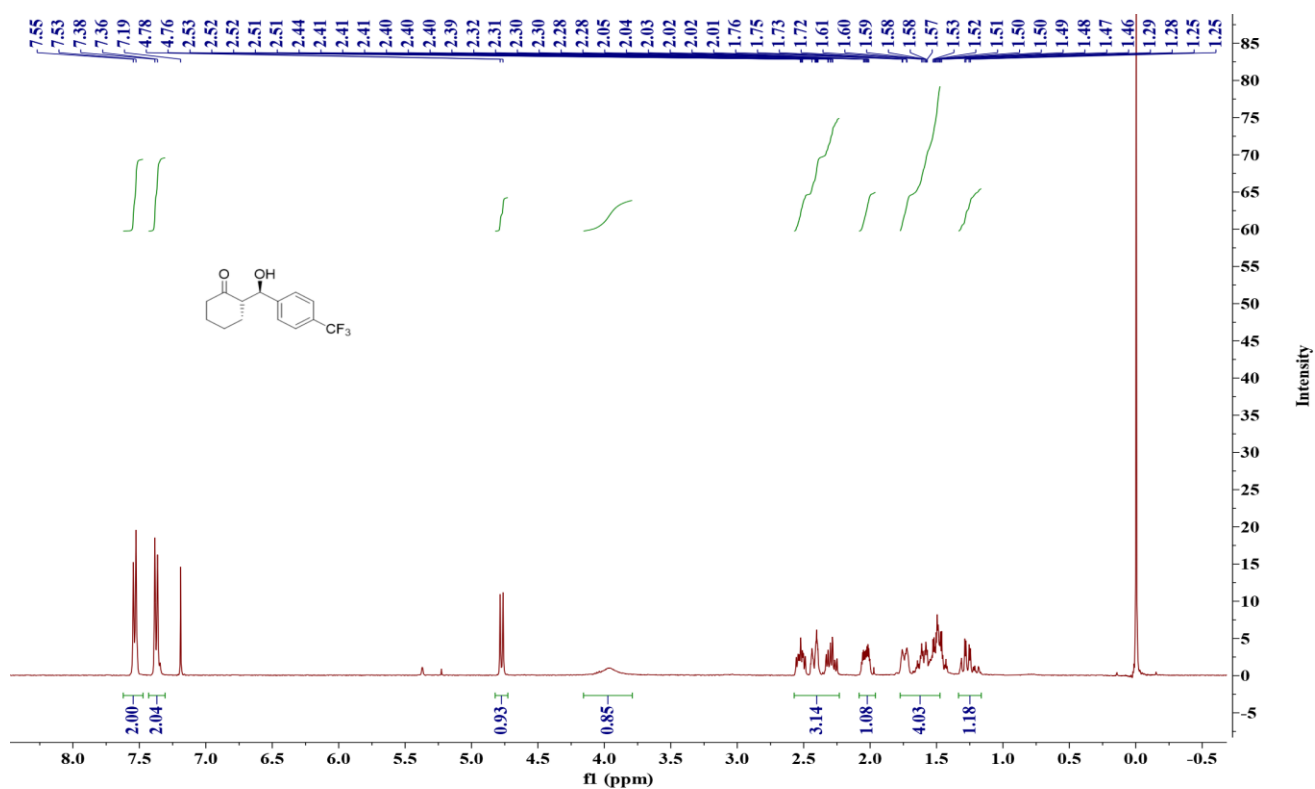

**(S,R)-5h:** (S)-2-((R)-hydroxy(2-nitrophenyl)methyl)cyclohexan-1-one.

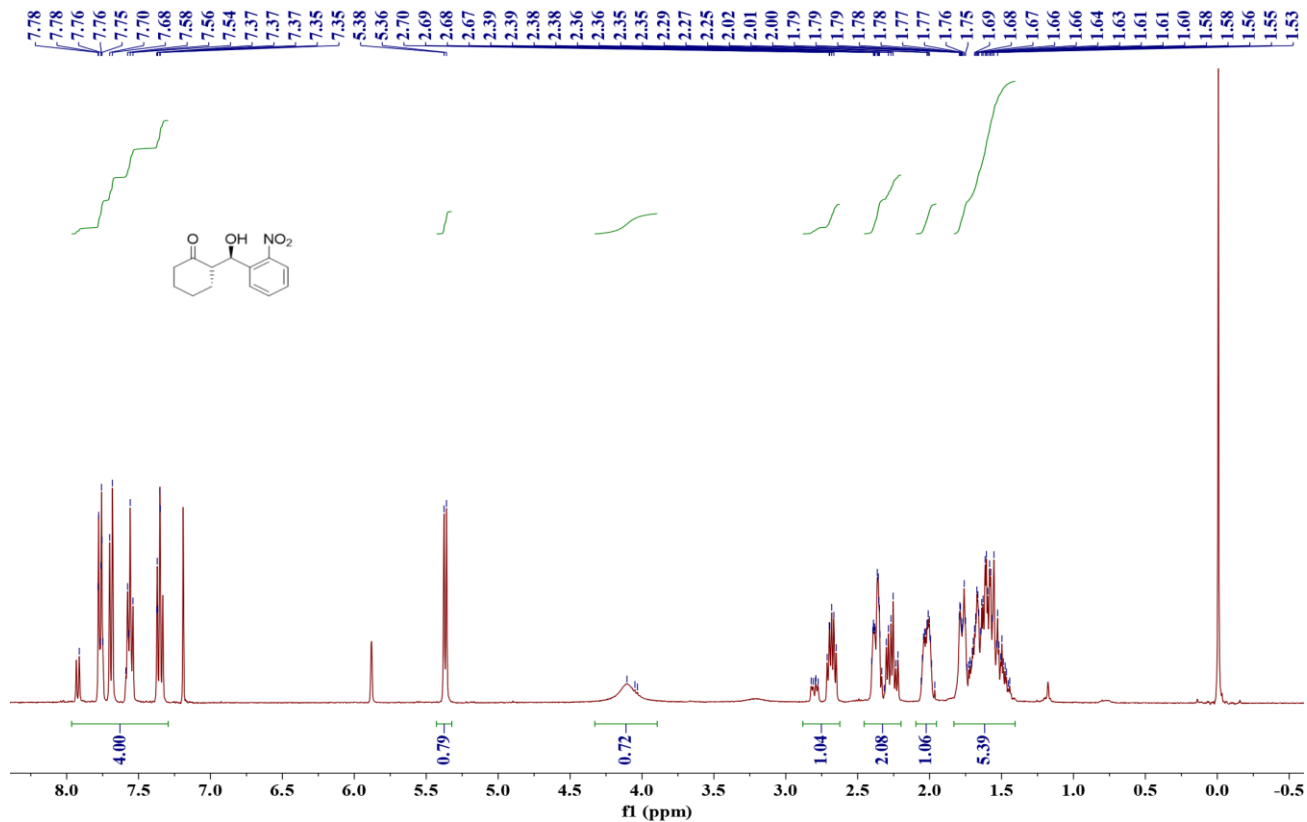

**(*S,R*)-5i:** (*S*)-2-((*R*)-hydroxy(3-nitrophenyl)methyl)cyclohexan-1-one.

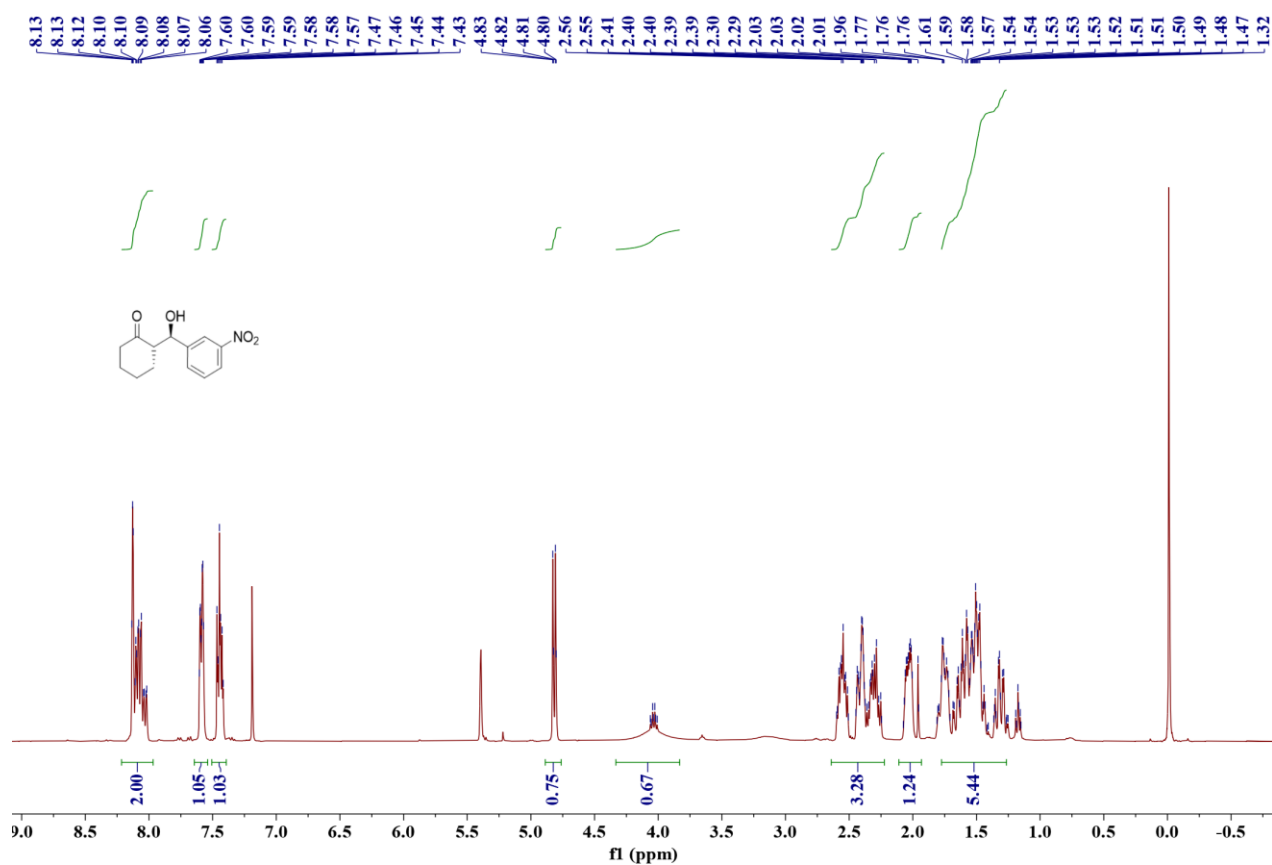

**(*S,R*)-5j:** (*S*)-2-((*R*)-hydroxy(4-nitrophenyl)methyl)cyclohexan-1-one.

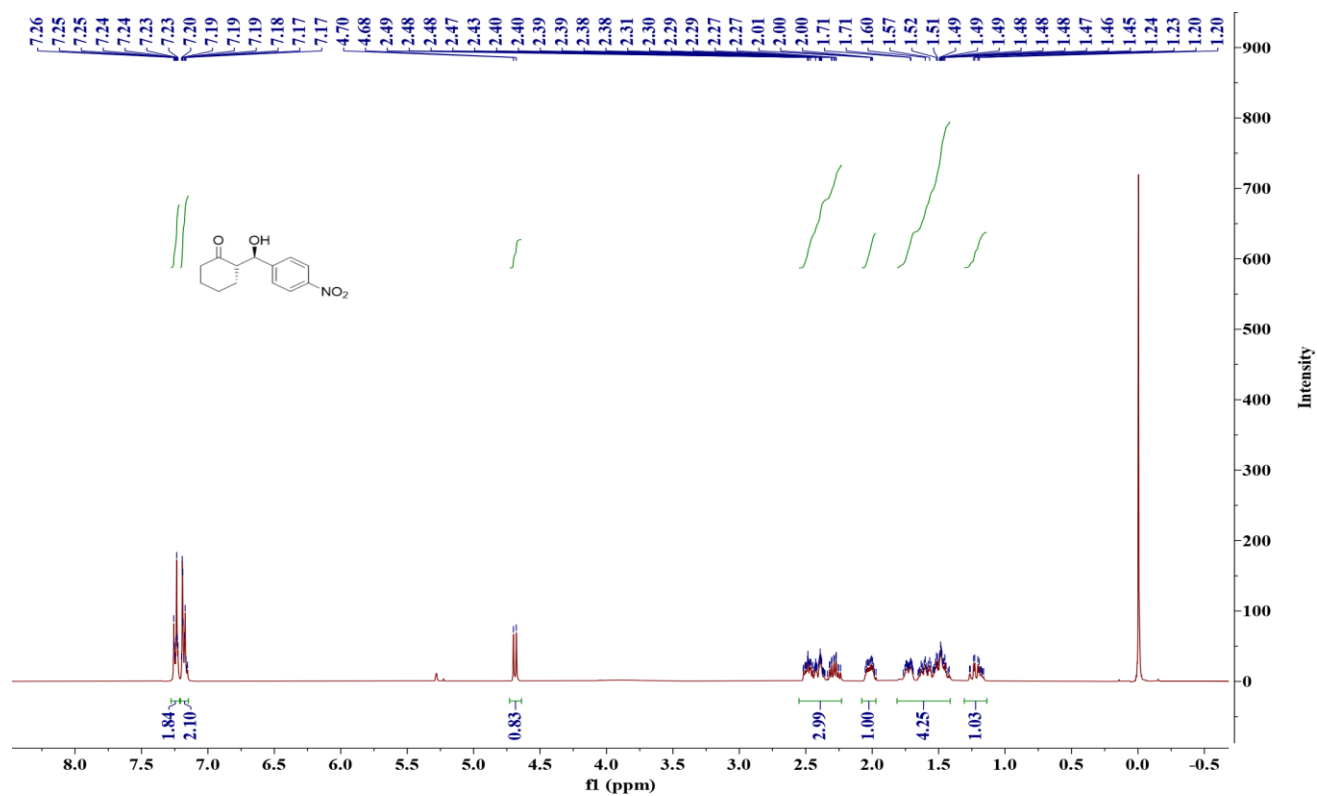

**(*S,R*)-5k:** 4-((*S*)-hydroxy((*R*)-2-oxocyclohexyl)methyl)benzonitrile.

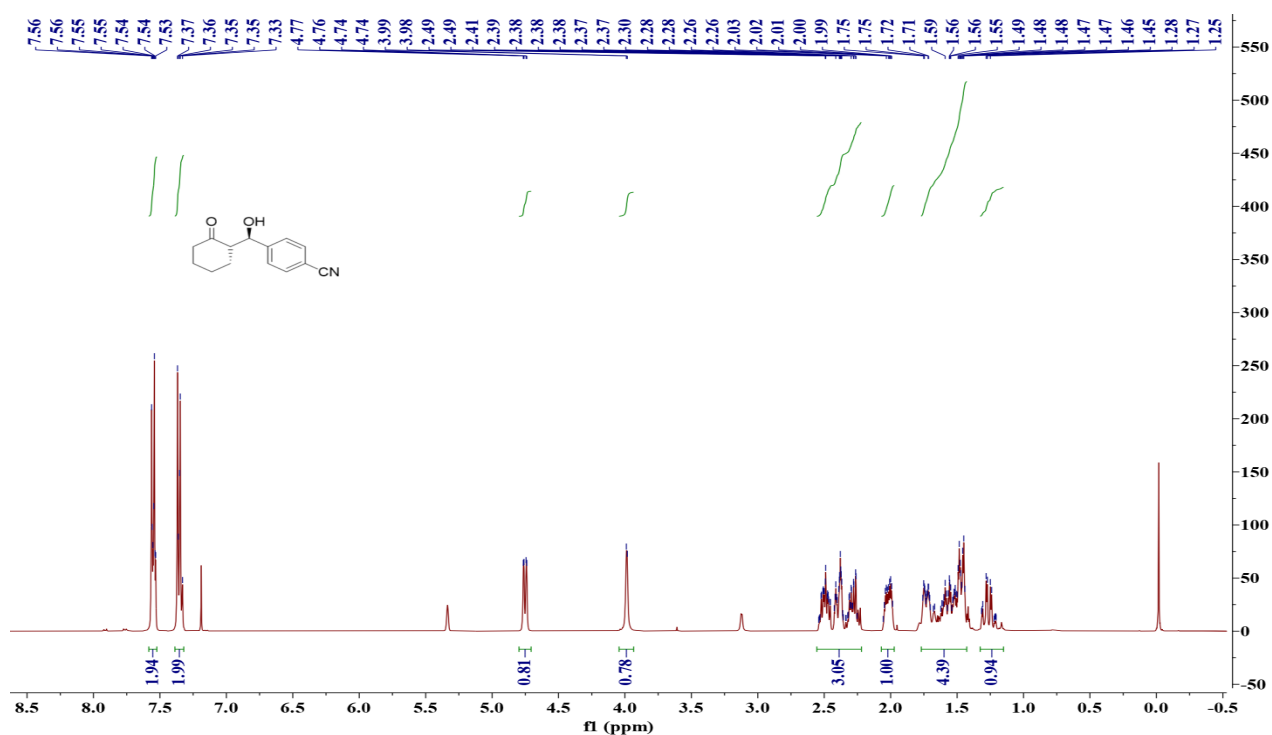

**(*S,R*)-5l:** (*S*)-2-((*R*)-hydroxy(*m*-tolyl)methyl)cyclohexan-1-one.

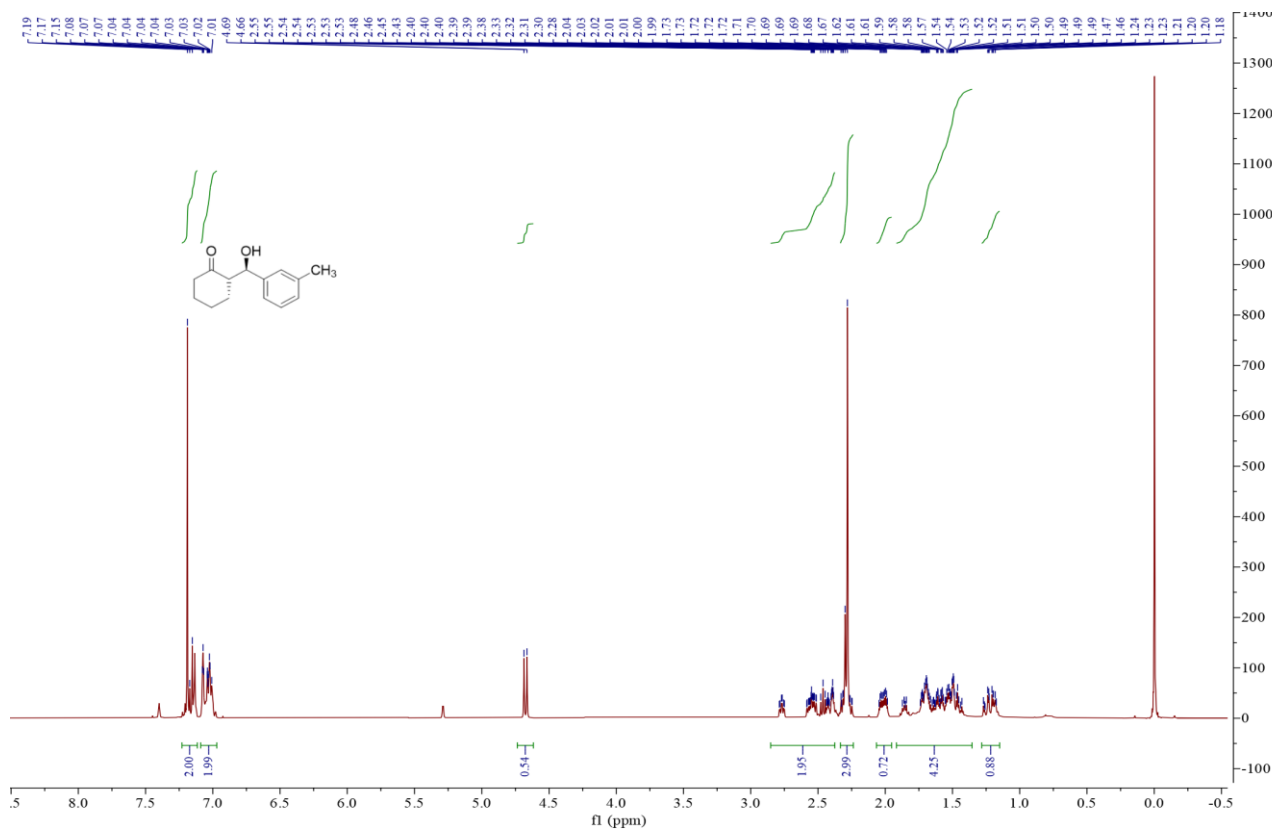

**(*S,R*)-5m:** (*S*)-2-((*R*)-hydroxy(*p*-tolyl)methyl)cyclohexan-1-one.

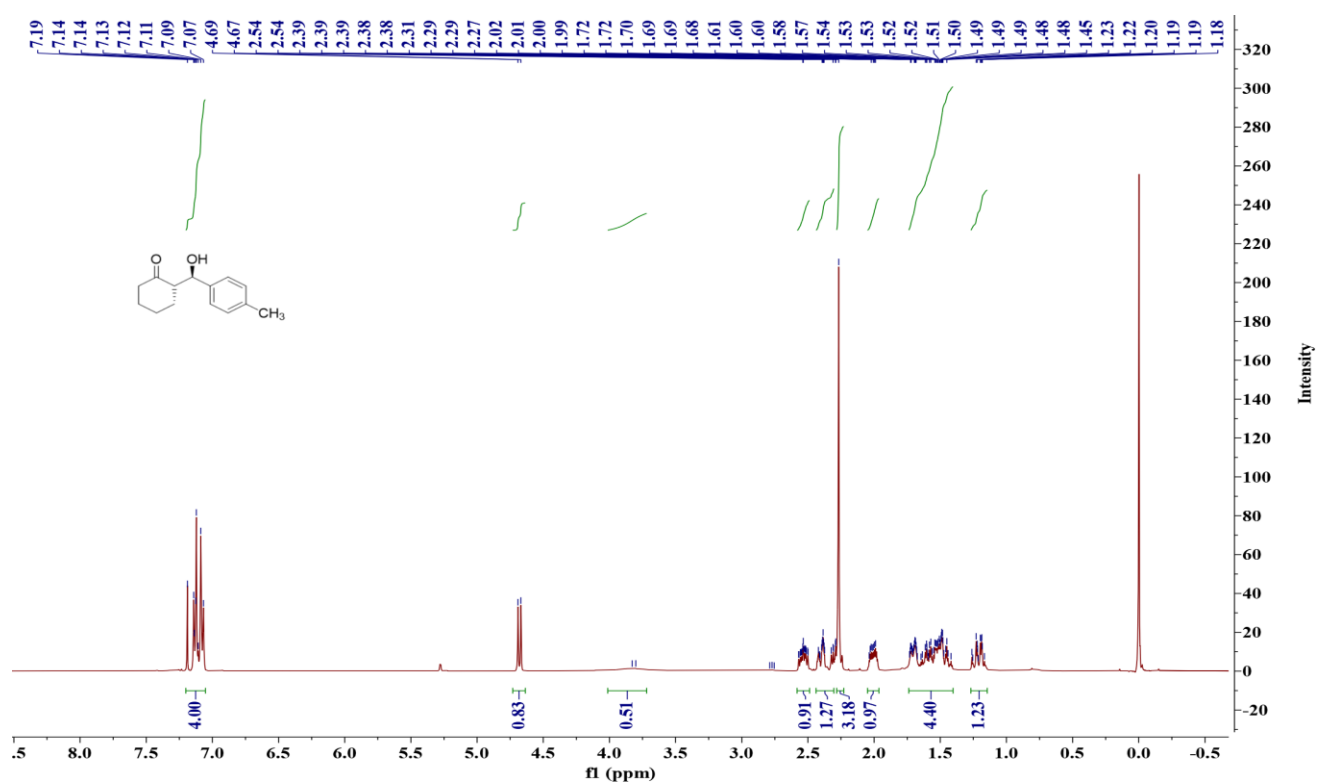

**(*S,R*)-5n:** (*S*)-2-((*R*)-furan-2-yl(hydroxy)methyl)cyclohexan-1-one.

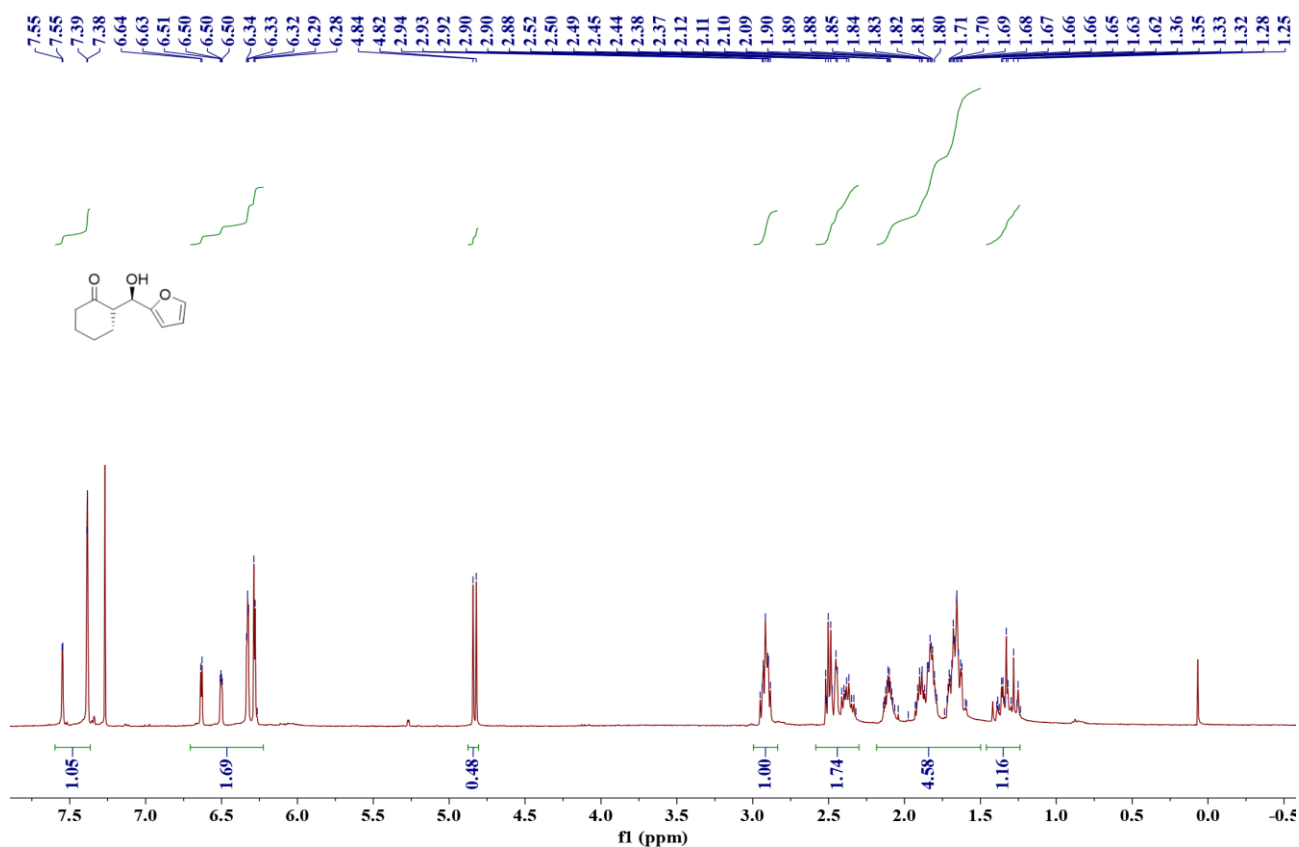

**(*S,R*)-5o:** (*S*)-2-((*R*)-hydroxy(thiophen-2-yl)methyl)cyclohexan-1-one.

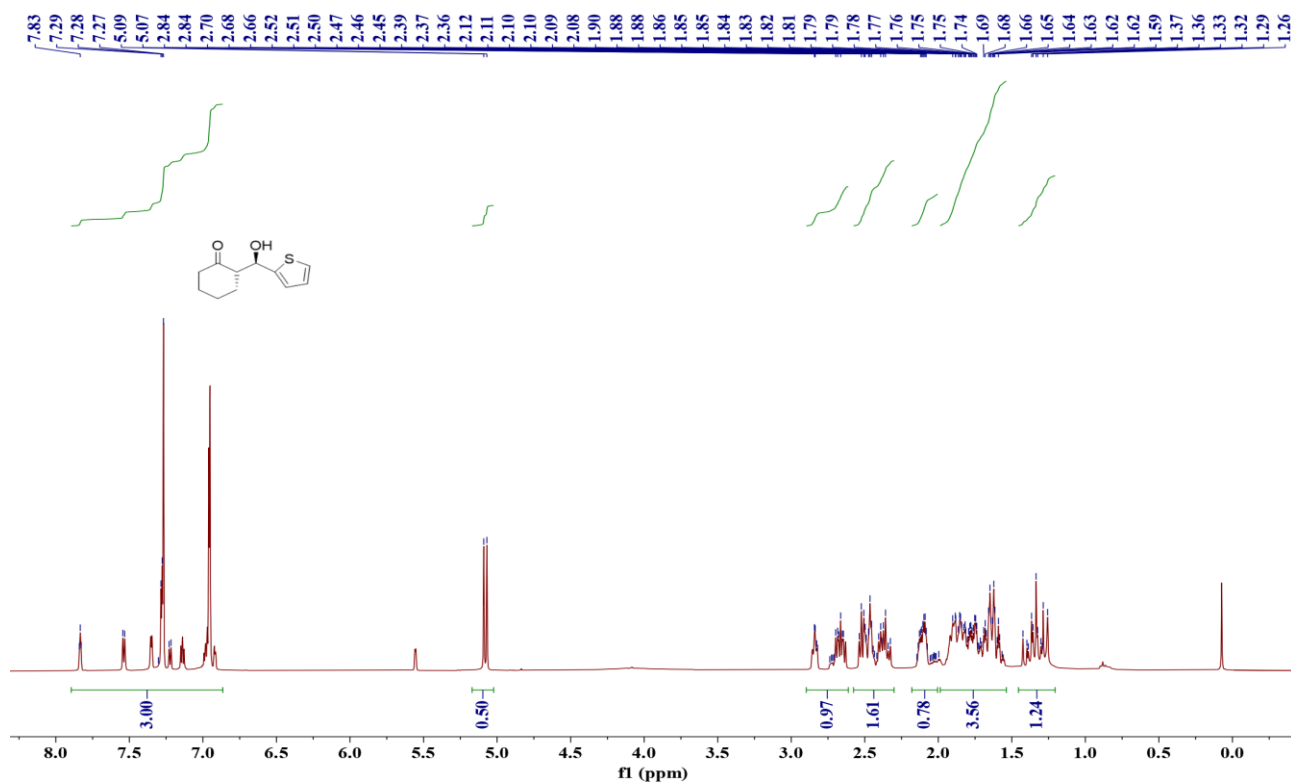

**(*S,R*)-5p:** (*S*)-2-((*R*)-hydroxy(naphthalen-1-yl)methyl)cyclohexan-1-one.

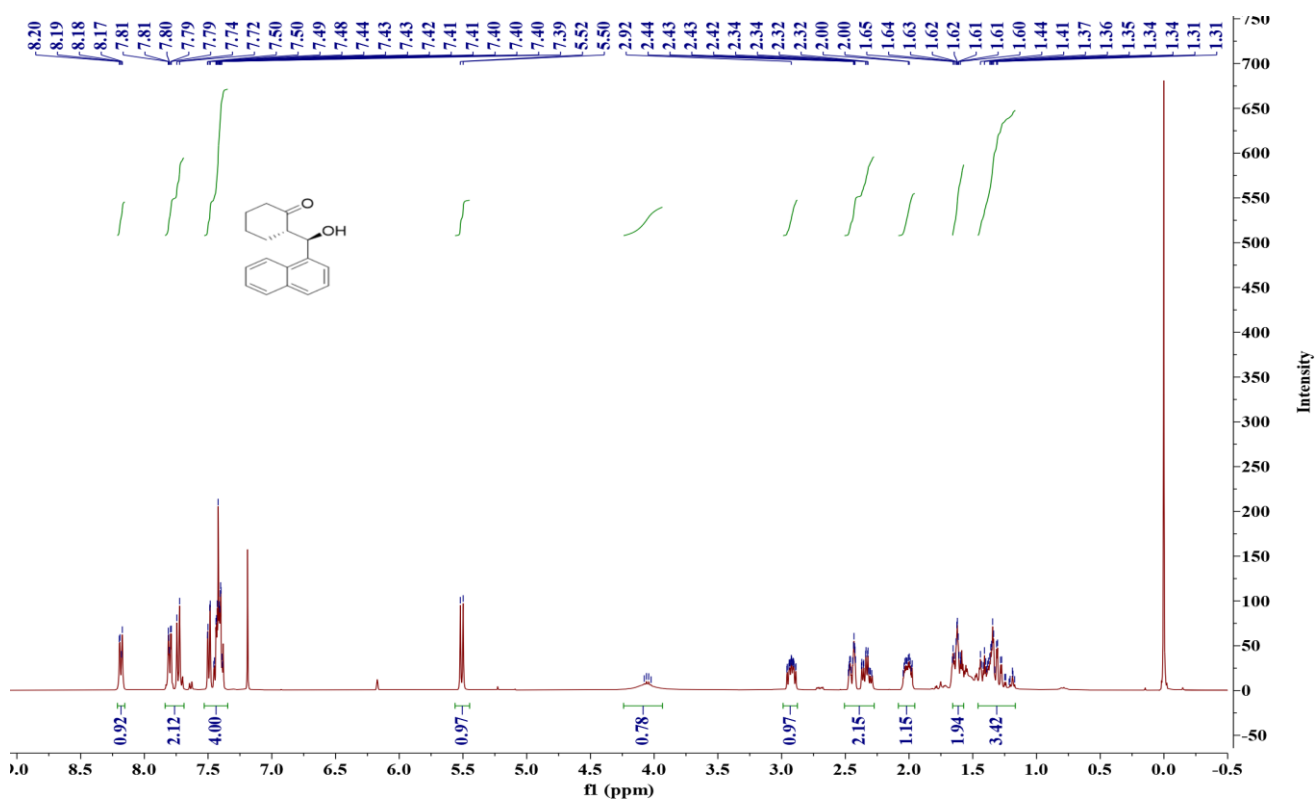

Supplement: d1gc02831f1.pdf [file d1gc02831f1.pdf]
